# Supplementary material for: Biradical character in the ground state of [Mn@Si12]+: a DFT and CASPT2 study
Source: Royal Society of Chemistry journal article supplement (doi:10.1039/c6cp03534e), 2016-01-01
Supplement: c6cp03534e1.pdf [file c6cp03534e1.pdf]

## **[Mn@Si<sub>12</sub>]<sup>+</sup>: a singlet or triplet ground state?**

*Vaida Arcisauskaitė<sup>a</sup>, Domagoj Fijian<sup>a</sup>, Mariano Spivak<sup>b</sup>, Coen de Graaf<sup>b,c</sup> and John E. McGrady<sup>a,\*</sup>*

<sup>1</sup>Department of Chemistry, University of Oxford, South Parks Road, Oxford OX1 3QR, U.K.

<sup>2</sup>Departament de Química Física i Inorgànica, Universitat Rovira i Virgili, Marcellí Domingo s/n, Tarragona E-43007, Spain

<sup>3</sup>Institució Catalana de Recerca i Estudis Avançats (ICREA), Passeig Lluís Companys 23, 08010 Barcelona, Spain

\*john.mcgrady@chem.ox.ac.uk

### **Supporting information**

1. Comparison with CrSi<sub>12</sub>
2. Comparison of active spaces
3. Analysis of the CASPT2 potential energy surface for [Mn@Si<sub>12</sub>]<sup>+</sup>
4. Cartesian coordinates

## 1 Comparison with Cr@Si<sub>12</sub>.

Table S1 contains a dataset for Cr@Si<sub>12</sub> which can be compared directly with Table 1 for [Mn@Si<sub>12</sub>]<sup>+</sup>. The same set of states has been identified in both cases, but for the chromium system the <sup>1</sup>A<sub>1g</sub> is clearly the ground state, irrespective of the chosen methodology (DFT or CASPT2). This is entirely consistent with all previous work on this molecule.

**Table S1. Relative energies, structural data, Mulliken spin densities and values of  $\langle S^2 \rangle$  for various states of Cr@Si<sub>12</sub>.**

|                                                  | <i>D</i> <sub>6h</sub> -symmetric States |                              |                              |                              |                              | <i>C</i> <sub>2h</sub> -symmetric States |                              | <i>C</i> <sub>s</sub> -symmetric states |
|--------------------------------------------------|------------------------------------------|------------------------------|------------------------------|------------------------------|------------------------------|------------------------------------------|------------------------------|-----------------------------------------|
|                                                  | <sup>1</sup> A <sub>1g</sub>             | <sup>1</sup> A <sub>2u</sub> | <sup>3</sup> A <sub>2u</sub> | <sup>1</sup> E <sub>2g</sub> | <sup>3</sup> E <sub>2g</sub> | <sup>3</sup> A <sub>g</sub>              | <sup>3</sup> B <sub>g</sub>  | <sup>3</sup> A'                         |
| <b>DFT: BLYP (B3LYP energies in parenthesis)</b> |                                          |                              |                              |                              |                              |                                          |                              |                                         |
| <b>Energy / eV</b>                               | +0.00<br>(+0.00)                         | +0.77<br>(+0.68)             | 0.76<br>(+0.83)              | +0.89<br>(+1.13)             | +0.69<br>(+0.70)             | +0.59<br>(+0.31)                         | +0.58<br>(+0.30)             | +0.58                                   |
| <b>Cr-Si / Å</b>                                 | 2.66 (2.63)                              | 2.67 (2.65)                  | 2.67(2.65)                   | 2.66 (2.64)                  | 2.67 (2.65)                  | 2.61 – 2.76<br>(2.56 – 2.79)             | 2.59 – 2.77<br>(2.55 – 2.79) | 2.60 – 2.74                             |
| <b>ρ(Cr)</b>                                     | 0.00 (0.00)                              | 1.49 (2.29)                  | 1.54(2.02)                   | 1.20 (1.96)                  | 1.99 (2.73)                  | 2.11 (3.00)                              | 1.98 (2.78)                  | 1.98                                    |
| <b>ρ(Si<sub>12</sub>)</b>                        | 0.00 (0.00)                              | -1.49 (-2.29)                | 0.46(-0.02)                  | -1.20 (-1.96)                | 0.01 (-0.73)                 | -0.11 (-1.00)                            | 0.02 (-0.78)                 | 0.02                                    |
| <b><math>\langle S^2 \rangle</math></b>          | 0.00 (0.00)                              | 1.12 (1.64)                  | 2.07(2.24)                   | §                            |                              | 2.17 (2.65)                              | 2.11 (2.48)                  | 2.12                                    |
| <b>CASPT2 @ BLYP geometry</b>                    |                                          |                              |                              |                              |                              |                                          |                              |                                         |
| <b>Energy / eV</b>                               | +0.00                                    | +0.75                        | +0.75                        |                              |                              | +0.78                                    | 0.72                         |                                         |

## 2. Comparison of active spaces.

In Table S2 the relative energies for CASPT2 calculations with (10,10) active space are compared to the (10,15) case presented in the main text. The 5 extra orbitals in the (10,15) CAS correspond to the 4d or 'double shell' set that has been shown to be significant for first row transition metals. In this case the energies are rather similar with the exception that the  $^1A_{1g}$  state is stabilized relative to the charge transfer states in the larger active space.

**Table S2. Relative energies (in eV) for various states of  $[Mn@Si_{12}]^+$  obtained with CASPT2 (@BLYP geometry) with different active spaces.**

|                           | $^1A_{1g}$ | $^1A_{2u}$ | $^3A_{2u}$ | $^3A_g$ | $^3B_g$ |
|---------------------------|------------|------------|------------|---------|---------|
| CAS(10,10) no 4d orbitals | +0.31      | +0.06      | +0.14      | +0.05   | 0.00    |
| CAS(10,15)                | +0.17      | +0.07      | +0.16      | +0.06   | 0.00    |

### 3. Analysis of the CASPT2 potential energy surface

In Table S3, the total energies of the various states are presented when either the BLYP or the B3LYP geometry is used. The B3LYP geometries give total energies that lie 0.06-0.13 eV lower in energy, but the key  $^1A_{2u} - ^3B_g$  separation remains essentially unaltered.

**Table S3. CASPT2 (10,15) energies (eV) for various states of  $[Mn@Si_{12}]^+$  obtained with CASPT2 @BLYP and @B3LYP geometries.**

|                 | $^1A_{1g}$  | $^1A_{2u}$  | $^3A_{2u}$  | $^3A_g$     | $^3B_g$     |
|-----------------|-------------|-------------|-------------|-------------|-------------|
| E (@BLYP geom)  | -126096.778 | -126096.880 | -126096.789 | -126096.892 | -126096.950 |
| E (@B3LYP geom) | -126096.905 | -126096.940 | -126096.889 | -126096.982 | -126097.031 |

The main structural difference between the B3LYP and BLYP geometries is the Mn-Si bond lengths, which are systematically shorter than in the former by  $\sim 0.02$  Å. We have therefore systematically varied the Mn-Si distances by increasing/decreasing them in 0.01 Å steps for both  $^1A_{2u}$  and  $^3B_g$  geometries (Tables S4 and S5). For  $D_{6h}$ -symmetric  $^1A_{2u}$  there are only 2 variable (the Mn-Si bond length and the angle to the polar axis) so the geometry was re-optimised for each Mn-Si distance (B3LYP) before the CASPT2 calculation. For  $C_{2h}$ -symmetric  $^3B_g$  the situation is more complicated because there are 4 symmetry distinct Mn-Si distances. We have therefore chosen to decrease all twelve bonds equally from their B3LYP optimized values without further optimisation (Table S5)

**Table S4. CASPT2 (10,15) energies (eV) for the  $^1A_{2u}$  state at fixed Mn-Si (Å) bond lengths (geometries were optimised with the B3LYP functional).**

| <b>d(Mn-Si), Å</b> | <b>CASPT2 energy, eV</b> |
|--------------------|--------------------------|
| 2.61               | -126097.019              |
| 2.62               | -126097.026              |
| 2.625              | -126097.024              |
| 2.63               | -126097.019              |
| 2.64               | -126096.999              |
| 2.65               | -126096.967              |
| 2.66               | -126096.920              |
| 2.67               | -126096.862              |
| 2.68               | -126096.795              |
| 2.69               | -126096.717              |

**Table S5. CASPT2 (10,15) energies (eV) for the  $^3B_g$  state at fixed Mn-Si (Å) bond lengths (Mn-Si bondlengths were modified (each by 0.01 Å at a time) for the geometry optimised with the B3LYP functional).**

| <b>d(Mn-Si<sub>1/12</sub>), Å</b> | <b>d(Mn-Si<sub>4/5/8/9</sub>), Å</b> | <b>d(Mn-Si<sub>2/3/10/11</sub>), Å</b> | <b>d(Mn-Si<sub>6/7</sub>), Å</b> | <b>CASPT2 energy, eV</b> |
|-----------------------------------|--------------------------------------|----------------------------------------|----------------------------------|--------------------------|
| 2.51                              | 2.56                                 | 2.69                                   | 2.56                             | -126097.035              |
| 2.52                              | 2.57                                 | 2.70                                   | 2.57                             | -126097.072              |
| 2.53                              | 2.58                                 | 2.71                                   | 2.58                             | -126097.093              |
| 2.54                              | 2.59                                 | 2.72                                   | 2.59                             | -126097.100              |
| 2.55                              | 2.60                                 | 2.73                                   | 2.60                             | -126097.093              |
| 2.56                              | 2.61                                 | 2.74                                   | 2.61                             | -126097.071              |
| 2.57                              | 2.62                                 | 2.75                                   | 2.62                             | -126097.037              |

The data in Tables S4 and S5 are summarised schematically in Figure S1 (schematically because the coordinate that describes the distortion from the minimum is not easily defined). The BLYP geometries lie further from the CASPT2 minimum than B3LYP, but the surfaces lie parallel and so the key conclusion, that the triplet lies below the singlet, is robust to these changes.

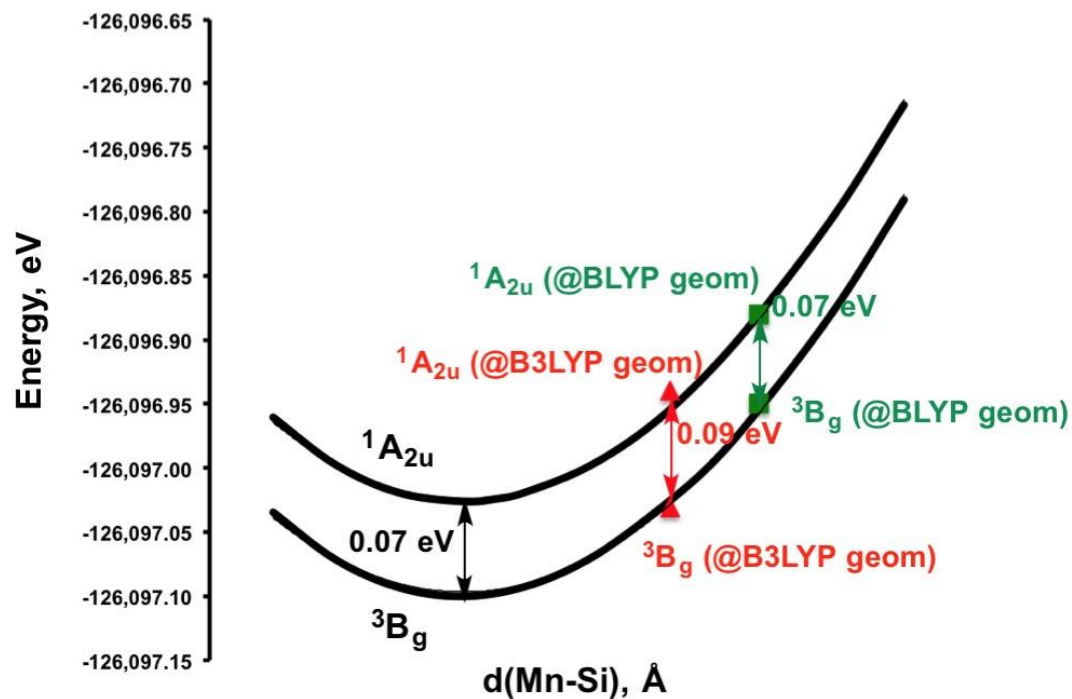

Figure S1. Schematic representation of the potential energy curve for the  $^1A_{2u}$  and  $^3B_g$  states of  $[Mn@Si_{12}]^+$  obtained with CASPT2 (10,15). All the data used can be found in Table S1, Table S2 and Table S3.

4. Optimised Cartesian coordinates for all states.

Table S6. Cartesian coordinates and total energies of all stationary points for [Mn@Si<sub>12</sub>]<sup>†</sup>

| BLYP                                                                                                                                                                                                                                                                                                                                                                                                                                                                                                                                                         | B3LYP                                                                                                                                                                                                                                                                                                                                                                                                                                                                                                                                                          |
|--------------------------------------------------------------------------------------------------------------------------------------------------------------------------------------------------------------------------------------------------------------------------------------------------------------------------------------------------------------------------------------------------------------------------------------------------------------------------------------------------------------------------------------------------------------|----------------------------------------------------------------------------------------------------------------------------------------------------------------------------------------------------------------------------------------------------------------------------------------------------------------------------------------------------------------------------------------------------------------------------------------------------------------------------------------------------------------------------------------------------------------|
| <sup>1</sup> A <sub>1g</sub> , BLYP functional, E=-49.00647681 eV<br>1.Si -2.367662 0.000000 1.198187<br>2.Si -1.183831 2.050455 1.198187<br>3.Si -1.183831 -2.050455 1.198187<br>4.Si 1.183831 2.050455 1.198187<br>5.Si 1.183831 -2.050455 1.198187<br>6.Si 2.367662 0.000000 1.198187<br>7.Si -2.367662 0.000000 -1.198187<br>8.Si -1.183831 2.050455 -1.198187<br>9.Si -1.183831 -2.050455 -1.198187<br>10.Si 1.183831 2.050455 -1.198187<br>11.Si 1.183831 -2.050455 -1.198187<br>12.Si 2.367662 0.000000 -1.198187<br>13.Mn 0.000000 0.000000 0.000000 | <sup>1</sup> A <sub>1g</sub> , B3LYP functional, E=-64.15041444 eV<br>1.Si -2.343262 0.000000 1.191430<br>2.Si -1.171631 2.029325 1.191430<br>3.Si -1.171631 -2.029325 1.191430<br>4.Si 1.171631 2.029325 1.191430<br>5.Si 1.171631 -2.029325 1.191430<br>6.Si 2.343262 0.000000 1.191430<br>7.Si -2.343262 0.000000 -1.191430<br>8.Si -1.171631 2.029325 -1.191430<br>9.Si -1.171631 -2.029325 -1.191430<br>10.Si 1.171631 2.029325 -1.191430<br>11.Si 1.171631 -2.029325 -1.191430<br>12.Si 2.343262 0.000000 -1.191430<br>13.Mn 0.000000 0.000000 0.000000  |
| <sup>1</sup> A <sub>2u</sub> , BLYP functional, E=-49.02887420 eV<br>1.Si -2.386474 0.000000 1.190175<br>2.Si -1.193237 2.066747 1.190175<br>3.Si -1.193237 -2.066747 1.190175<br>4.Si 1.193237 2.066747 1.190175<br>5.Si 1.193237 -2.066747 1.190175<br>6.Si 2.386474 0.000000 1.190175<br>7.Si -2.386474 0.000000 -1.190175<br>8.Si -1.193237 2.066747 -1.190175<br>9.Si -1.193237 -2.066747 -1.190175<br>10.Si 1.193237 2.066747 -1.190175<br>11.Si 1.193237 -2.066747 -1.190175<br>12.Si 2.386474 0.000000 -1.190175<br>13.Mn 0.000000 0.000000 0.000000 | <sup>1</sup> A <sub>2u</sub> , B3LYP functional, E= -64.41585116 eV<br>1.Si -2.376906 0.000000 1.186682<br>2.Si -1.188453 2.058461 1.186682<br>3.Si -1.188453 -2.058461 1.186682<br>4.Si 1.188453 2.058461 1.186682<br>5.Si 1.188453 -2.058461 1.186682<br>6.Si 2.376906 0.000000 1.186682<br>7.Si -2.376906 0.000000 -1.186682<br>8.Si -1.188453 2.058461 -1.186682<br>9.Si -1.188453 -2.058461 -1.186682<br>10.Si 1.188453 2.058461 -1.186682<br>11.Si 1.188453 -2.058461 -1.186682<br>12.Si 2.376906 0.000000 -1.186682<br>13.Mn 0.000000 0.000000 0.000000 |
| <sup>3</sup> A <sub>2u</sub> , BLYP functional, E=-49.00481475 eV<br>1.Si -2.384155 0.000000 1.189342<br>2.Si -1.192078 2.064739 1.189342<br>3.Si -1.192078 -2.064739 1.189342<br>4.Si 1.192078 2.064739 1.189342<br>5.Si 1.192078 -2.064739 1.189342<br>6.Si 2.384155 0.000000 1.189342<br>7.Si -2.384155 0.000000 -1.189342                                                                                                                                                                                                                                | <sup>3</sup> A <sub>2u</sub> , B3LYP functional, E=-64.13292363 eV<br>1.Si -2.368739 0.000000 1.183764<br>2.Si -1.184369 2.051388 1.183764<br>3.Si -1.184369 -2.051388 1.183764<br>4.Si 1.184369 2.051388 1.183764<br>5.Si 1.184369 -2.051388 1.183764<br>6.Si 2.368739 0.000000 1.183764<br>7.Si -2.368739 0.000000 -1.183764                                                                                                                                                                                                                                 |

|                                                                                                                                                                                                                                                                                                                                                                                                                                                                                                                                                                  |                                                                                                                                                                                                                                                                                                                                                                                                                                                                                                                                                                   |
|------------------------------------------------------------------------------------------------------------------------------------------------------------------------------------------------------------------------------------------------------------------------------------------------------------------------------------------------------------------------------------------------------------------------------------------------------------------------------------------------------------------------------------------------------------------|-------------------------------------------------------------------------------------------------------------------------------------------------------------------------------------------------------------------------------------------------------------------------------------------------------------------------------------------------------------------------------------------------------------------------------------------------------------------------------------------------------------------------------------------------------------------|
| 8.Si -1.192078 2.064739 -1.189342<br>9.Si -1.192078 -2.064739 -1.189342<br>10.Si 1.192078 2.064739 -1.189342<br>11.Si 1.192078 -2.064739 -1.189342<br>12.Si 2.384155 0.000000 -1.189342<br>13.Mn 0.000000 0.000000 0.000000                                                                                                                                                                                                                                                                                                                                      | 8.Si -1.184369 2.051388 -1.183764<br>9.Si -1.184369 -2.051388 -1.183764<br>10.Si 1.184369 2.051388 -1.183764<br>11.Si 1.184369 -2.051388 -1.183764<br>12.Si 2.368739 0.000000 -1.183764<br>13.Mn 0.000000 0.000000 0.000000                                                                                                                                                                                                                                                                                                                                       |
| <b><sup>1</sup>E<sub>2g</sub>, BLYP functional, E=-48.78749984 eV</b><br>1.Si -2.354738 0.000000 1.219680<br>2.Si -1.177369 2.039263 1.219680<br>3.Si -1.177369 -2.039263 1.219680<br>4.Si 1.177369 2.039263 1.219680<br>5.Si 1.177369 -2.039263 1.219680<br>6.Si 2.354738 0.000000 1.219680<br>7.Si -2.354738 0.000000 -1.219680<br>8.Si -1.177369 2.039263 -1.219680<br>9.Si -1.177369 -2.039263 -1.219680<br>10.Si 1.177369 2.039263 -1.219680<br>11.Si 1.177369 -2.039263 -1.219680<br>12.Si 2.354738 0.000000 -1.219680<br>13.Mn 0.000000 0.000000 0.000000 | <b><sup>1</sup>E<sub>2g</sub>, B3LYP functional, E=-63.78203179 eV</b><br>1.Si -2.339345 0.000000 1.220604<br>2.Si -1.169673 2.025933 1.220604<br>3.Si -1.169673 -2.025933 1.220604<br>4.Si 1.169673 2.025933 1.220604<br>5.Si 1.169673 -2.025933 1.220604<br>6.Si 2.339345 0.000000 1.220604<br>7.Si -2.339345 0.000000 -1.220604<br>8.Si -1.169673 2.025933 -1.220604<br>9.Si -1.169673 -2.025933 -1.220604<br>10.Si 1.169673 2.025933 -1.220604<br>11.Si 1.169673 -2.025933 -1.220604<br>12.Si 2.339345 0.000000 -1.220604<br>13.Mn 0.000000 0.000000 0.000000 |
| <b><sup>3</sup>E<sub>2g</sub>, BLYP functional, E=-48.98262524 eV</b><br>1.Si -2.371665 0.000000 1.212329<br>2.Si -1.185832 2.053922 1.212329<br>3.Si -1.185832 -2.053922 1.212329<br>4.Si 1.185832 2.053922 1.212329<br>5.Si 1.185832 -2.053922 1.212329<br>6.Si 2.371665 0.000000 1.212329<br>7.Si -2.371665 0.000000 -1.212329<br>8.Si -1.185832 2.053922 -1.212329<br>9.Si -1.185832 -2.053922 -1.212329<br>10.Si 1.185832 2.053922 -1.212329<br>11.Si 1.185832 -2.053922 -1.212329<br>12.Si 2.371665 0.000000 -1.212329<br>13.Mn 0.000000 0.000000 0.000000 | <b><sup>3</sup>E<sub>2g</sub>, B3LYP functional, E=-64.24144173 eV</b><br>1.Si -2.364059 0.000000 1.207857<br>2.Si -1.182029 2.047335 1.207857<br>3.Si -1.182029 -2.047335 1.207857<br>4.Si 1.182029 2.047335 1.207857<br>5.Si 1.182029 -2.047335 1.207857<br>6.Si 2.364059 0.000000 1.207857<br>7.Si -2.364059 0.000000 -1.207857<br>8.Si -1.182029 2.047335 -1.207857<br>9.Si -1.182029 -2.047335 -1.207857<br>10.Si 1.182029 2.047335 -1.207857<br>11.Si 1.182029 -2.047335 -1.207857<br>12.Si 2.364059 0.000000 -1.207857<br>13.Mn 0.000000 0.000000 0.000000 |
| <b><sup>3</sup>A<sub>g</sub>, BLYP functional, E=-49.09722408 eV</b><br>1.Si -1.259520 -2.451849 0.000000<br>2.Si -1.199046 -1.181196 -1.988375<br>3.Si -1.199046 -1.181196 1.988375<br>4.Si -1.196898 1.222106 -2.040785<br>5.Si -1.196898 1.222106 2.040785                                                                                                                                                                                                                                                                                                    | <b><sup>3</sup>A<sub>g</sub>, B3LYP functional, E=-64.60396832 eV</b><br>1.Si -1.265486 -2.424070 0.000000<br>2.Si -1.189743 -1.182308 -1.989596<br>3.Si -1.189743 -1.182308 1.989596<br>4.Si -1.201710 1.209192 -2.032188<br>5.Si -1.201710 1.209192 2.032188                                                                                                                                                                                                                                                                                                    |



|                                                                                                                                                                                                                                                                                                                                                                                                                                                                                                                                                             |                                                                                                                                                                                                                                                                                                                                                                                                                                                                                                                                                             |
|-------------------------------------------------------------------------------------------------------------------------------------------------------------------------------------------------------------------------------------------------------------------------------------------------------------------------------------------------------------------------------------------------------------------------------------------------------------------------------------------------------------------------------------------------------------|-------------------------------------------------------------------------------------------------------------------------------------------------------------------------------------------------------------------------------------------------------------------------------------------------------------------------------------------------------------------------------------------------------------------------------------------------------------------------------------------------------------------------------------------------------------|
| 6.Si -1.228362 2.404340 0.000000<br>7.Si 1.228362 -2.404340 0.000000<br>8.Si 1.196898 -1.222106 -2.040785<br>9.Si 1.196898 -1.222106 2.040785<br>10.Si 1.199046 1.181196 -1.988375<br>11.Si 1.199046 1.181196 1.988375<br>12.Si 1.259520 2.451849 0.000000<br>13.Mn 0.000000 0.000000 0.000000                                                                                                                                                                                                                                                              | 6.Si -1.196711 2.388743 0.000000<br>7.Si 1.196711 -2.388743 0.000000<br>8.Si 1.201710 -1.209192 -2.032188<br>9.Si 1.201710 -1.209192 2.032188<br>10.Si 1.189743 1.182308 -1.989596<br>11.Si 1.189743 1.182308 1.989596<br>12.Si 1.265486 2.424070 0.000000<br>13.Mn 0.000000 0.000000 0.000000                                                                                                                                                                                                                                                              |
| <sup>3</sup> B <sub>g</sub> , BLYP functional, E=-49.09477400 eV<br>1.Si -1.196356 -2.281646 0.000000<br>2.Si -1.253198 -1.222433 -2.134118<br>3.Si -1.253198 -1.222433 2.134118<br>4.Si -1.196210 1.126006 -2.068813<br>5.Si -1.196210 1.126006 2.068813<br>6.Si -1.173736 2.338749 0.000000<br>7.Si 1.173736 -2.338749 0.000000<br>8.Si 1.196210 -1.126006 -2.068813<br>9.Si 1.196210 -1.126006 2.068813<br>10.Si 1.253198 1.222433 -2.134118<br>11.Si 1.253198 1.222433 2.134118<br>12.Si 1.196356 2.281646 0.000000<br>13.Mn 0.000000 0.000000 0.000000 | <sup>3</sup> B <sub>g</sub> , BLYP functional, E=-64.62391273 eV<br>1.Si -1.177619 -2.287221 0.000000<br>2.Si -1.264063 -1.221850 -2.115539<br>3.Si -1.264063 -1.221850 2.115539<br>4.Si -1.158600 1.123381 -2.065017<br>5.Si -1.158600 1.123381 2.065017<br>6.Si -1.195125 2.335255 0.000000<br>7.Si 1.195125 -2.335255 0.000000<br>8.Si 1.158600 -1.123381 -2.065017<br>9.Si 1.158600 -1.123381 2.065017<br>10.Si 1.264063 1.221850 -2.115539<br>11.Si 1.264063 1.221850 2.115539<br>12.Si 1.177619 2.287221 0.000000<br>13.Mn 0.000000 0.000000 0.000000 |
| <sup>3</sup> A', BLYP functional, E=-49.10034321 eV<br>1.Si 0.060904 -1.226727 -2.367326<br>2.Si -1.991788 -1.337614 -1.192696<br>3.Si 2.110554 -1.053838 -1.195820<br>4.Si -1.991788 -1.337614 1.192696<br>5.Si 2.110554 -1.053838 1.195820<br>6.Si 0.060904 -1.226727 2.367326<br>7.Si -0.057076 1.233383 -2.495949<br>8.Si -2.029838 1.053687 -1.218596<br>9.Si 1.911870 1.331327 -1.196076<br>10.Si -2.029838 1.053687 1.218596<br>11.Si 1.911870 1.331327 1.196076<br>12.Si -0.057076 1.233383 2.495949<br>13.Mn -0.004713 -0.000227 0.000000          |                                                                                                                                                                                                                                                                                                                                                                                                                                                                                                                                                             |

Table 4S. Cartesian coordinates and total energies of all stationary points for Cr@Si<sub>12</sub>

|                                                                   |                                                                    |
|-------------------------------------------------------------------|--------------------------------------------------------------------|
| <sup>1</sup> A <sub>1g</sub> , BLYP functional, E=-55.60827270 eV | <sup>1</sup> A <sub>1g</sub> , B3LYP functional, E=-70.73135257 eV |
|-------------------------------------------------------------------|--------------------------------------------------------------------|

|                                                                        |           |           |           |                                                                        |           |           |           |
|------------------------------------------------------------------------|-----------|-----------|-----------|------------------------------------------------------------------------|-----------|-----------|-----------|
| 1.Si                                                                   | 2.050585  | 1.183906  | 1.203427  | 1.Si                                                                   | 2.029794  | 1.171902  | 1.194621  |
| 2.Si                                                                   | 2.050585  | -1.183906 | 1.203427  | 2.Si                                                                   | 2.029794  | -1.171902 | 1.194621  |
| 3.Si                                                                   | 0.000000  | 2.367812  | 1.203427  | 3.Si                                                                   | 0.000000  | 2.343804  | 1.194621  |
| 4.Si                                                                   | 0.000000  | -2.367812 | 1.203427  | 4.Si                                                                   | 0.000000  | -2.343804 | 1.194621  |
| 5.Si                                                                   | -2.050585 | 1.183906  | 1.203427  | 5.Si                                                                   | -2.029794 | 1.171902  | 1.194621  |
| 6.Si                                                                   | -2.050585 | -1.183906 | 1.203427  | 6.Si                                                                   | -2.029794 | -1.171902 | 1.194621  |
| 7.Si                                                                   | 2.050585  | 1.183906  | -1.203427 | 7.Si                                                                   | 2.029794  | 1.171902  | -1.194621 |
| 8.Si                                                                   | 2.050585  | -1.183906 | -1.203427 | 8.Si                                                                   | 2.029794  | -1.171902 | -1.194621 |
| 9.Si                                                                   | 0.000000  | 2.367812  | -1.203427 | 9.Si                                                                   | 0.000000  | 2.343804  | -1.194621 |
| 10.Si                                                                  | 0.000000  | -2.367812 | -1.203427 | 10.Si                                                                  | 0.000000  | -2.343804 | -1.194621 |
| 11.Si                                                                  | -2.050585 | 1.183906  | -1.203427 | 11.Si                                                                  | -2.029794 | 1.171902  | -1.194621 |
| 12.Si                                                                  | -2.050585 | -1.183906 | -1.203427 | 12.Si                                                                  | -2.029794 | -1.171902 | -1.194621 |
| 13.Cr                                                                  | 0.000000  | 0.000000  | 0.000000  | 13.Cr                                                                  | 0.000000  | 0.000000  | 0.000000  |
| <b><sup>1</sup>A<sub>2u</sub>, BLYP functional, E=-54.83800104 eV</b>  |           |           |           | <b><sup>1</sup>A<sub>2u</sub>, B3LYP functional, E=-70.04700419</b>    |           |           |           |
| 1.Si                                                                   | 2.068394  | 1.194188  | 1.193794  | 1.Si                                                                   | 2.054883  | 1.186387  | 1.188339  |
| 2.Si                                                                   | 2.068394  | -1.194188 | 1.193794  | 2.Si                                                                   | 2.054883  | -1.186387 | 1.188339  |
| 3.Si                                                                   | 0.000000  | 2.388376  | 1.193794  | 3.Si                                                                   | 0.000000  | 2.372774  | 1.188339  |
| 4.Si                                                                   | 0.000000  | -2.388376 | 1.193794  | 4.Si                                                                   | 0.000000  | -2.372774 | 1.188339  |
| 5.Si                                                                   | -2.068394 | 1.194188  | 1.193794  | 5.Si                                                                   | -2.054883 | 1.186387  | 1.188339  |
| 6.Si                                                                   | -2.068394 | -1.194188 | 1.193794  | 6.Si                                                                   | -2.054883 | -1.186387 | 1.188339  |
| 7.Si                                                                   | 2.068394  | 1.194188  | -1.193794 | 7.Si                                                                   | 2.054883  | 1.186387  | -1.188339 |
| 8.Si                                                                   | 2.068394  | -1.194188 | -1.193794 | 8.Si                                                                   | 2.054883  | -1.186387 | -1.188339 |
| 9.Si                                                                   | 0.000000  | 2.388376  | -1.193794 | 9.Si                                                                   | 0.000000  | 2.372774  | -1.188339 |
| 10.Si                                                                  | 0.000000  | -2.388376 | -1.193794 | 10.Si                                                                  | 0.000000  | -2.372774 | -1.188339 |
| 11.Si                                                                  | -2.068394 | 1.194188  | -1.193794 | 11.Si                                                                  | -2.054883 | 1.186387  | -1.188339 |
| 12.Si                                                                  | -2.068394 | -1.194188 | -1.193794 | 12.Si                                                                  | -2.054883 | -1.186387 | -1.188339 |
| 13.Cr                                                                  | 0.000000  | 0.000000  | 0.000000  | 13.Cr                                                                  | 0.000000  | 0.000000  | 0.000000  |
| <b><sup>3</sup>A<sub>2u</sub>, BLYP functional, E= -54.83900670 eV</b> |           |           |           | <b><sup>3</sup>A<sub>2u</sub>, B3LYP functional, E=-69.89744007 eV</b> |           |           |           |
| 1.Si                                                                   | 2.067070  | 1.193423  | 1.193326  | 1.Si                                                                   | 2.049728  | 1.183411  | 1.185730  |
| 2.Si                                                                   | 2.067070  | -1.193423 | 1.193326  | 2.Si                                                                   | 2.049728  | -1.183411 | 1.185730  |
| 3.Si                                                                   | 0.000000  | 2.386847  | 1.193326  | 3.Si                                                                   | 0.000000  | 2.366822  | 1.185730  |
| 4.Si                                                                   | 0.000000  | -2.386847 | 1.193326  | 4.Si                                                                   | 0.000000  | -2.366822 | 1.185730  |
| 5.Si                                                                   | -2.067070 | 1.193423  | 1.193326  | 5.Si                                                                   | -2.049728 | 1.183411  | 1.185730  |
| 6.Si                                                                   | -2.067070 | -1.193423 | 1.193326  | 6.Si                                                                   | -2.049728 | -1.183411 | 1.185730  |
| 7.Si                                                                   | 2.067070  | 1.193423  | -1.193326 | 7.Si                                                                   | 2.049728  | 1.183411  | -1.185730 |
| 8.Si                                                                   | 2.067070  | -1.193423 | -1.193326 | 8.Si                                                                   | 2.049728  | -1.183411 | -1.185730 |
| 9.Si                                                                   | 0.000000  | 2.386847  | -1.193326 | 9.Si                                                                   | 0.000000  | 2.366822  | -1.185730 |
| 10.Si                                                                  | 0.000000  | -2.386847 | -1.193326 | 10.Si                                                                  | 0.000000  | -2.366822 | -1.185730 |
| 11.Si                                                                  | -2.067070 | 1.193423  | -1.193326 | 11.Si                                                                  | -2.049728 | 1.183411  | -1.185730 |
| 12.Si                                                                  | -2.067070 | -1.193423 | -1.193326 | 12.Si                                                                  | -2.049728 | -1.183411 | -1.185730 |
| 13.Cr                                                                  | 0.000000  | 0.000000  | 0.000000  | 13.Cr                                                                  | 0.000000  | 0.000000  | 0.000000  |

|                                                                                                                                                                                                                                                                                                                                                                                                                                                                                                                                                                                                                                                                                                                                                                                                                                                                                                                                                                                                                                                                                                                                                 |           |           |           |          |      |           |           |           |      |           |           |          |      |           |           |           |      |           |          |          |      |           |           |          |      |          |           |           |      |          |           |           |      |          |           |           |       |          |           |           |       |           |          |           |                                                                                                                                                                                                                                                                                                                                                                                                                                                                                                                                                                                                                                                                                                                                                                                                                                                                                                                                                                                           |           |           |           |          |          |           |           |                                                                                                                                                                                                                                                                                                                                                                                                                                                                                                                                                                                                                                                                                                                                                                                                                                                                                                                                                                                                                                                                                                                                                  |      |           |           |          |      |           |           |           |      |           |          |          |      |           |           |          |      |           |           |          |      |           |           |           |      |          |           |           |       |          |           |           |       |          |          |           |       |          |           |           |       |           |          |           |       |           |           |           |       |          |          |          |
|-------------------------------------------------------------------------------------------------------------------------------------------------------------------------------------------------------------------------------------------------------------------------------------------------------------------------------------------------------------------------------------------------------------------------------------------------------------------------------------------------------------------------------------------------------------------------------------------------------------------------------------------------------------------------------------------------------------------------------------------------------------------------------------------------------------------------------------------------------------------------------------------------------------------------------------------------------------------------------------------------------------------------------------------------------------------------------------------------------------------------------------------------|-----------|-----------|-----------|----------|------|-----------|-----------|-----------|------|-----------|-----------|----------|------|-----------|-----------|-----------|------|-----------|----------|----------|------|-----------|-----------|----------|------|----------|-----------|-----------|------|----------|-----------|-----------|------|----------|-----------|-----------|-------|----------|-----------|-----------|-------|-----------|----------|-----------|-------------------------------------------------------------------------------------------------------------------------------------------------------------------------------------------------------------------------------------------------------------------------------------------------------------------------------------------------------------------------------------------------------------------------------------------------------------------------------------------------------------------------------------------------------------------------------------------------------------------------------------------------------------------------------------------------------------------------------------------------------------------------------------------------------------------------------------------------------------------------------------------------------------------------------------------------------------------------------------------|-----------|-----------|-----------|----------|----------|-----------|-----------|--------------------------------------------------------------------------------------------------------------------------------------------------------------------------------------------------------------------------------------------------------------------------------------------------------------------------------------------------------------------------------------------------------------------------------------------------------------------------------------------------------------------------------------------------------------------------------------------------------------------------------------------------------------------------------------------------------------------------------------------------------------------------------------------------------------------------------------------------------------------------------------------------------------------------------------------------------------------------------------------------------------------------------------------------------------------------------------------------------------------------------------------------|------|-----------|-----------|----------|------|-----------|-----------|-----------|------|-----------|----------|----------|------|-----------|-----------|----------|------|-----------|-----------|----------|------|-----------|-----------|-----------|------|----------|-----------|-----------|-------|----------|-----------|-----------|-------|----------|----------|-----------|-------|----------|-----------|-----------|-------|-----------|----------|-----------|-------|-----------|-----------|-----------|-------|----------|----------|----------|
| <p><b><sup>1</sup>E<sub>2g</sub>, BLYP functional, E=-54.71144388 eV</b></p> <table border="1"> <tbody> <tr><td>1.Si</td><td>2.048893</td><td>1.182929</td><td>1.219683</td></tr> <tr><td>2.Si</td><td>2.048893</td><td>-1.182929</td><td>1.219683</td></tr> <tr><td>3.Si</td><td>0.000000</td><td>2.365858</td><td>1.219683</td></tr> <tr><td>4.Si</td><td>0.000000</td><td>-2.365858</td><td>1.219683</td></tr> <tr><td>5.Si</td><td>-2.048893</td><td>1.182929</td><td>1.219683</td></tr> <tr><td>6.Si</td><td>-2.048893</td><td>-1.182929</td><td>1.219683</td></tr> <tr><td>7.Si</td><td>2.048893</td><td>1.182929</td><td>-1.219683</td></tr> <tr><td>8.Si</td><td>2.048893</td><td>-1.182929</td><td>-1.219683</td></tr> <tr><td>9.Si</td><td>0.000000</td><td>2.365858</td><td>-1.219683</td></tr> <tr><td>10.Si</td><td>0.000000</td><td>-2.365858</td><td>-1.219683</td></tr> <tr><td>11.Si</td><td>-2.048893</td><td>1.182929</td><td>-1.219683</td></tr> <tr><td>12.Si</td><td>-2.048893</td><td>-1.182929</td><td>-1.219683</td></tr> <tr><td>13.Cr</td><td>0.000000</td><td>0.000000</td><td>0.000000</td></tr> </tbody> </table> | 1.Si      | 2.048893  | 1.182929  | 1.219683 | 2.Si | 2.048893  | -1.182929 | 1.219683  | 3.Si | 0.000000  | 2.365858  | 1.219683 | 4.Si | 0.000000  | -2.365858 | 1.219683  | 5.Si | -2.048893 | 1.182929 | 1.219683 | 6.Si | -2.048893 | -1.182929 | 1.219683 | 7.Si | 2.048893 | 1.182929  | -1.219683 | 8.Si | 2.048893 | -1.182929 | -1.219683 | 9.Si | 0.000000 | 2.365858  | -1.219683 | 10.Si | 0.000000 | -2.365858 | -1.219683 | 11.Si | -2.048893 | 1.182929 | -1.219683 | 12.Si                                                                                                                                                                                                                                                                                                                                                                                                                                                                                                                                                                                                                                                                                                                                                                                                                                                                                                                                                                                     | -2.048893 | -1.182929 | -1.219683 | 13.Cr    | 0.000000 | 0.000000  | 0.000000  | <p><b><sup>1</sup>E<sub>2g</sub>, B3LYP functional, E=-69.60198913 eV</b></p> <table border="1"> <tbody> <tr><td>1.Si</td><td>2.029669</td><td>1.171830</td><td>1.217411</td></tr> <tr><td>2.Si</td><td>2.029669</td><td>-1.171830</td><td>1.217411</td></tr> <tr><td>3.Si</td><td>0.000000</td><td>2.343660</td><td>1.217411</td></tr> <tr><td>4.Si</td><td>0.000000</td><td>-2.343660</td><td>1.217411</td></tr> <tr><td>5.Si</td><td>-2.029669</td><td>1.171830</td><td>1.217411</td></tr> <tr><td>6.Si</td><td>-2.029669</td><td>-1.171830</td><td>1.217411</td></tr> <tr><td>7.Si</td><td>2.029669</td><td>1.171830</td><td>-1.217411</td></tr> <tr><td>8.Si</td><td>2.029669</td><td>-1.171830</td><td>-1.217411</td></tr> <tr><td>9.Si</td><td>0.000000</td><td>2.343660</td><td>-1.217411</td></tr> <tr><td>10.Si</td><td>0.000000</td><td>-2.343660</td><td>-1.217411</td></tr> <tr><td>11.Si</td><td>-2.029669</td><td>1.171830</td><td>-1.217411</td></tr> <tr><td>12.Si</td><td>-2.029669</td><td>-1.171830</td><td>-1.217411</td></tr> <tr><td>13.Cr</td><td>0.000000</td><td>0.000000</td><td>0.000000</td></tr> </tbody> </table> | 1.Si | 2.029669  | 1.171830  | 1.217411 | 2.Si | 2.029669  | -1.171830 | 1.217411  | 3.Si | 0.000000  | 2.343660 | 1.217411 | 4.Si | 0.000000  | -2.343660 | 1.217411 | 5.Si | -2.029669 | 1.171830  | 1.217411 | 6.Si | -2.029669 | -1.171830 | 1.217411  | 7.Si | 2.029669 | 1.171830  | -1.217411 | 8.Si  | 2.029669 | -1.171830 | -1.217411 | 9.Si  | 0.000000 | 2.343660 | -1.217411 | 10.Si | 0.000000 | -2.343660 | -1.217411 | 11.Si | -2.029669 | 1.171830 | -1.217411 | 12.Si | -2.029669 | -1.171830 | -1.217411 | 13.Cr | 0.000000 | 0.000000 | 0.000000 |
| 1.Si                                                                                                                                                                                                                                                                                                                                                                                                                                                                                                                                                                                                                                                                                                                                                                                                                                                                                                                                                                                                                                                                                                                                            | 2.048893  | 1.182929  | 1.219683  |          |      |           |           |           |      |           |           |          |      |           |           |           |      |           |          |          |      |           |           |          |      |          |           |           |      |          |           |           |      |          |           |           |       |          |           |           |       |           |          |           |                                                                                                                                                                                                                                                                                                                                                                                                                                                                                                                                                                                                                                                                                                                                                                                                                                                                                                                                                                                           |           |           |           |          |          |           |           |                                                                                                                                                                                                                                                                                                                                                                                                                                                                                                                                                                                                                                                                                                                                                                                                                                                                                                                                                                                                                                                                                                                                                  |      |           |           |          |      |           |           |           |      |           |          |          |      |           |           |          |      |           |           |          |      |           |           |           |      |          |           |           |       |          |           |           |       |          |          |           |       |          |           |           |       |           |          |           |       |           |           |           |       |          |          |          |
| 2.Si                                                                                                                                                                                                                                                                                                                                                                                                                                                                                                                                                                                                                                                                                                                                                                                                                                                                                                                                                                                                                                                                                                                                            | 2.048893  | -1.182929 | 1.219683  |          |      |           |           |           |      |           |           |          |      |           |           |           |      |           |          |          |      |           |           |          |      |          |           |           |      |          |           |           |      |          |           |           |       |          |           |           |       |           |          |           |                                                                                                                                                                                                                                                                                                                                                                                                                                                                                                                                                                                                                                                                                                                                                                                                                                                                                                                                                                                           |           |           |           |          |          |           |           |                                                                                                                                                                                                                                                                                                                                                                                                                                                                                                                                                                                                                                                                                                                                                                                                                                                                                                                                                                                                                                                                                                                                                  |      |           |           |          |      |           |           |           |      |           |          |          |      |           |           |          |      |           |           |          |      |           |           |           |      |          |           |           |       |          |           |           |       |          |          |           |       |          |           |           |       |           |          |           |       |           |           |           |       |          |          |          |
| 3.Si                                                                                                                                                                                                                                                                                                                                                                                                                                                                                                                                                                                                                                                                                                                                                                                                                                                                                                                                                                                                                                                                                                                                            | 0.000000  | 2.365858  | 1.219683  |          |      |           |           |           |      |           |           |          |      |           |           |           |      |           |          |          |      |           |           |          |      |          |           |           |      |          |           |           |      |          |           |           |       |          |           |           |       |           |          |           |                                                                                                                                                                                                                                                                                                                                                                                                                                                                                                                                                                                                                                                                                                                                                                                                                                                                                                                                                                                           |           |           |           |          |          |           |           |                                                                                                                                                                                                                                                                                                                                                                                                                                                                                                                                                                                                                                                                                                                                                                                                                                                                                                                                                                                                                                                                                                                                                  |      |           |           |          |      |           |           |           |      |           |          |          |      |           |           |          |      |           |           |          |      |           |           |           |      |          |           |           |       |          |           |           |       |          |          |           |       |          |           |           |       |           |          |           |       |           |           |           |       |          |          |          |
| 4.Si                                                                                                                                                                                                                                                                                                                                                                                                                                                                                                                                                                                                                                                                                                                                                                                                                                                                                                                                                                                                                                                                                                                                            | 0.000000  | -2.365858 | 1.219683  |          |      |           |           |           |      |           |           |          |      |           |           |           |      |           |          |          |      |           |           |          |      |          |           |           |      |          |           |           |      |          |           |           |       |          |           |           |       |           |          |           |                                                                                                                                                                                                                                                                                                                                                                                                                                                                                                                                                                                                                                                                                                                                                                                                                                                                                                                                                                                           |           |           |           |          |          |           |           |                                                                                                                                                                                                                                                                                                                                                                                                                                                                                                                                                                                                                                                                                                                                                                                                                                                                                                                                                                                                                                                                                                                                                  |      |           |           |          |      |           |           |           |      |           |          |          |      |           |           |          |      |           |           |          |      |           |           |           |      |          |           |           |       |          |           |           |       |          |          |           |       |          |           |           |       |           |          |           |       |           |           |           |       |          |          |          |
| 5.Si                                                                                                                                                                                                                                                                                                                                                                                                                                                                                                                                                                                                                                                                                                                                                                                                                                                                                                                                                                                                                                                                                                                                            | -2.048893 | 1.182929  | 1.219683  |          |      |           |           |           |      |           |           |          |      |           |           |           |      |           |          |          |      |           |           |          |      |          |           |           |      |          |           |           |      |          |           |           |       |          |           |           |       |           |          |           |                                                                                                                                                                                                                                                                                                                                                                                                                                                                                                                                                                                                                                                                                                                                                                                                                                                                                                                                                                                           |           |           |           |          |          |           |           |                                                                                                                                                                                                                                                                                                                                                                                                                                                                                                                                                                                                                                                                                                                                                                                                                                                                                                                                                                                                                                                                                                                                                  |      |           |           |          |      |           |           |           |      |           |          |          |      |           |           |          |      |           |           |          |      |           |           |           |      |          |           |           |       |          |           |           |       |          |          |           |       |          |           |           |       |           |          |           |       |           |           |           |       |          |          |          |
| 6.Si                                                                                                                                                                                                                                                                                                                                                                                                                                                                                                                                                                                                                                                                                                                                                                                                                                                                                                                                                                                                                                                                                                                                            | -2.048893 | -1.182929 | 1.219683  |          |      |           |           |           |      |           |           |          |      |           |           |           |      |           |          |          |      |           |           |          |      |          |           |           |      |          |           |           |      |          |           |           |       |          |           |           |       |           |          |           |                                                                                                                                                                                                                                                                                                                                                                                                                                                                                                                                                                                                                                                                                                                                                                                                                                                                                                                                                                                           |           |           |           |          |          |           |           |                                                                                                                                                                                                                                                                                                                                                                                                                                                                                                                                                                                                                                                                                                                                                                                                                                                                                                                                                                                                                                                                                                                                                  |      |           |           |          |      |           |           |           |      |           |          |          |      |           |           |          |      |           |           |          |      |           |           |           |      |          |           |           |       |          |           |           |       |          |          |           |       |          |           |           |       |           |          |           |       |           |           |           |       |          |          |          |
| 7.Si                                                                                                                                                                                                                                                                                                                                                                                                                                                                                                                                                                                                                                                                                                                                                                                                                                                                                                                                                                                                                                                                                                                                            | 2.048893  | 1.182929  | -1.219683 |          |      |           |           |           |      |           |           |          |      |           |           |           |      |           |          |          |      |           |           |          |      |          |           |           |      |          |           |           |      |          |           |           |       |          |           |           |       |           |          |           |                                                                                                                                                                                                                                                                                                                                                                                                                                                                                                                                                                                                                                                                                                                                                                                                                                                                                                                                                                                           |           |           |           |          |          |           |           |                                                                                                                                                                                                                                                                                                                                                                                                                                                                                                                                                                                                                                                                                                                                                                                                                                                                                                                                                                                                                                                                                                                                                  |      |           |           |          |      |           |           |           |      |           |          |          |      |           |           |          |      |           |           |          |      |           |           |           |      |          |           |           |       |          |           |           |       |          |          |           |       |          |           |           |       |           |          |           |       |           |           |           |       |          |          |          |
| 8.Si                                                                                                                                                                                                                                                                                                                                                                                                                                                                                                                                                                                                                                                                                                                                                                                                                                                                                                                                                                                                                                                                                                                                            | 2.048893  | -1.182929 | -1.219683 |          |      |           |           |           |      |           |           |          |      |           |           |           |      |           |          |          |      |           |           |          |      |          |           |           |      |          |           |           |      |          |           |           |       |          |           |           |       |           |          |           |                                                                                                                                                                                                                                                                                                                                                                                                                                                                                                                                                                                                                                                                                                                                                                                                                                                                                                                                                                                           |           |           |           |          |          |           |           |                                                                                                                                                                                                                                                                                                                                                                                                                                                                                                                                                                                                                                                                                                                                                                                                                                                                                                                                                                                                                                                                                                                                                  |      |           |           |          |      |           |           |           |      |           |          |          |      |           |           |          |      |           |           |          |      |           |           |           |      |          |           |           |       |          |           |           |       |          |          |           |       |          |           |           |       |           |          |           |       |           |           |           |       |          |          |          |
| 9.Si                                                                                                                                                                                                                                                                                                                                                                                                                                                                                                                                                                                                                                                                                                                                                                                                                                                                                                                                                                                                                                                                                                                                            | 0.000000  | 2.365858  | -1.219683 |          |      |           |           |           |      |           |           |          |      |           |           |           |      |           |          |          |      |           |           |          |      |          |           |           |      |          |           |           |      |          |           |           |       |          |           |           |       |           |          |           |                                                                                                                                                                                                                                                                                                                                                                                                                                                                                                                                                                                                                                                                                                                                                                                                                                                                                                                                                                                           |           |           |           |          |          |           |           |                                                                                                                                                                                                                                                                                                                                                                                                                                                                                                                                                                                                                                                                                                                                                                                                                                                                                                                                                                                                                                                                                                                                                  |      |           |           |          |      |           |           |           |      |           |          |          |      |           |           |          |      |           |           |          |      |           |           |           |      |          |           |           |       |          |           |           |       |          |          |           |       |          |           |           |       |           |          |           |       |           |           |           |       |          |          |          |
| 10.Si                                                                                                                                                                                                                                                                                                                                                                                                                                                                                                                                                                                                                                                                                                                                                                                                                                                                                                                                                                                                                                                                                                                                           | 0.000000  | -2.365858 | -1.219683 |          |      |           |           |           |      |           |           |          |      |           |           |           |      |           |          |          |      |           |           |          |      |          |           |           |      |          |           |           |      |          |           |           |       |          |           |           |       |           |          |           |                                                                                                                                                                                                                                                                                                                                                                                                                                                                                                                                                                                                                                                                                                                                                                                                                                                                                                                                                                                           |           |           |           |          |          |           |           |                                                                                                                                                                                                                                                                                                                                                                                                                                                                                                                                                                                                                                                                                                                                                                                                                                                                                                                                                                                                                                                                                                                                                  |      |           |           |          |      |           |           |           |      |           |          |          |      |           |           |          |      |           |           |          |      |           |           |           |      |          |           |           |       |          |           |           |       |          |          |           |       |          |           |           |       |           |          |           |       |           |           |           |       |          |          |          |
| 11.Si                                                                                                                                                                                                                                                                                                                                                                                                                                                                                                                                                                                                                                                                                                                                                                                                                                                                                                                                                                                                                                                                                                                                           | -2.048893 | 1.182929  | -1.219683 |          |      |           |           |           |      |           |           |          |      |           |           |           |      |           |          |          |      |           |           |          |      |          |           |           |      |          |           |           |      |          |           |           |       |          |           |           |       |           |          |           |                                                                                                                                                                                                                                                                                                                                                                                                                                                                                                                                                                                                                                                                                                                                                                                                                                                                                                                                                                                           |           |           |           |          |          |           |           |                                                                                                                                                                                                                                                                                                                                                                                                                                                                                                                                                                                                                                                                                                                                                                                                                                                                                                                                                                                                                                                                                                                                                  |      |           |           |          |      |           |           |           |      |           |          |          |      |           |           |          |      |           |           |          |      |           |           |           |      |          |           |           |       |          |           |           |       |          |          |           |       |          |           |           |       |           |          |           |       |           |           |           |       |          |          |          |
| 12.Si                                                                                                                                                                                                                                                                                                                                                                                                                                                                                                                                                                                                                                                                                                                                                                                                                                                                                                                                                                                                                                                                                                                                           | -2.048893 | -1.182929 | -1.219683 |          |      |           |           |           |      |           |           |          |      |           |           |           |      |           |          |          |      |           |           |          |      |          |           |           |      |          |           |           |      |          |           |           |       |          |           |           |       |           |          |           |                                                                                                                                                                                                                                                                                                                                                                                                                                                                                                                                                                                                                                                                                                                                                                                                                                                                                                                                                                                           |           |           |           |          |          |           |           |                                                                                                                                                                                                                                                                                                                                                                                                                                                                                                                                                                                                                                                                                                                                                                                                                                                                                                                                                                                                                                                                                                                                                  |      |           |           |          |      |           |           |           |      |           |          |          |      |           |           |          |      |           |           |          |      |           |           |           |      |          |           |           |       |          |           |           |       |          |          |           |       |          |           |           |       |           |          |           |       |           |           |           |       |          |          |          |
| 13.Cr                                                                                                                                                                                                                                                                                                                                                                                                                                                                                                                                                                                                                                                                                                                                                                                                                                                                                                                                                                                                                                                                                                                                           | 0.000000  | 0.000000  | 0.000000  |          |      |           |           |           |      |           |           |          |      |           |           |           |      |           |          |          |      |           |           |          |      |          |           |           |      |          |           |           |      |          |           |           |       |          |           |           |       |           |          |           |                                                                                                                                                                                                                                                                                                                                                                                                                                                                                                                                                                                                                                                                                                                                                                                                                                                                                                                                                                                           |           |           |           |          |          |           |           |                                                                                                                                                                                                                                                                                                                                                                                                                                                                                                                                                                                                                                                                                                                                                                                                                                                                                                                                                                                                                                                                                                                                                  |      |           |           |          |      |           |           |           |      |           |          |          |      |           |           |          |      |           |           |          |      |           |           |           |      |          |           |           |       |          |           |           |       |          |          |           |       |          |           |           |       |           |          |           |       |           |           |           |       |          |          |          |
| 1.Si                                                                                                                                                                                                                                                                                                                                                                                                                                                                                                                                                                                                                                                                                                                                                                                                                                                                                                                                                                                                                                                                                                                                            | 2.029669  | 1.171830  | 1.217411  |          |      |           |           |           |      |           |           |          |      |           |           |           |      |           |          |          |      |           |           |          |      |          |           |           |      |          |           |           |      |          |           |           |       |          |           |           |       |           |          |           |                                                                                                                                                                                                                                                                                                                                                                                                                                                                                                                                                                                                                                                                                                                                                                                                                                                                                                                                                                                           |           |           |           |          |          |           |           |                                                                                                                                                                                                                                                                                                                                                                                                                                                                                                                                                                                                                                                                                                                                                                                                                                                                                                                                                                                                                                                                                                                                                  |      |           |           |          |      |           |           |           |      |           |          |          |      |           |           |          |      |           |           |          |      |           |           |           |      |          |           |           |       |          |           |           |       |          |          |           |       |          |           |           |       |           |          |           |       |           |           |           |       |          |          |          |
| 2.Si                                                                                                                                                                                                                                                                                                                                                                                                                                                                                                                                                                                                                                                                                                                                                                                                                                                                                                                                                                                                                                                                                                                                            | 2.029669  | -1.171830 | 1.217411  |          |      |           |           |           |      |           |           |          |      |           |           |           |      |           |          |          |      |           |           |          |      |          |           |           |      |          |           |           |      |          |           |           |       |          |           |           |       |           |          |           |                                                                                                                                                                                                                                                                                                                                                                                                                                                                                                                                                                                                                                                                                                                                                                                                                                                                                                                                                                                           |           |           |           |          |          |           |           |                                                                                                                                                                                                                                                                                                                                                                                                                                                                                                                                                                                                                                                                                                                                                                                                                                                                                                                                                                                                                                                                                                                                                  |      |           |           |          |      |           |           |           |      |           |          |          |      |           |           |          |      |           |           |          |      |           |           |           |      |          |           |           |       |          |           |           |       |          |          |           |       |          |           |           |       |           |          |           |       |           |           |           |       |          |          |          |
| 3.Si                                                                                                                                                                                                                                                                                                                                                                                                                                                                                                                                                                                                                                                                                                                                                                                                                                                                                                                                                                                                                                                                                                                                            | 0.000000  | 2.343660  | 1.217411  |          |      |           |           |           |      |           |           |          |      |           |           |           |      |           |          |          |      |           |           |          |      |          |           |           |      |          |           |           |      |          |           |           |       |          |           |           |       |           |          |           |                                                                                                                                                                                                                                                                                                                                                                                                                                                                                                                                                                                                                                                                                                                                                                                                                                                                                                                                                                                           |           |           |           |          |          |           |           |                                                                                                                                                                                                                                                                                                                                                                                                                                                                                                                                                                                                                                                                                                                                                                                                                                                                                                                                                                                                                                                                                                                                                  |      |           |           |          |      |           |           |           |      |           |          |          |      |           |           |          |      |           |           |          |      |           |           |           |      |          |           |           |       |          |           |           |       |          |          |           |       |          |           |           |       |           |          |           |       |           |           |           |       |          |          |          |
| 4.Si                                                                                                                                                                                                                                                                                                                                                                                                                                                                                                                                                                                                                                                                                                                                                                                                                                                                                                                                                                                                                                                                                                                                            | 0.000000  | -2.343660 | 1.217411  |          |      |           |           |           |      |           |           |          |      |           |           |           |      |           |          |          |      |           |           |          |      |          |           |           |      |          |           |           |      |          |           |           |       |          |           |           |       |           |          |           |                                                                                                                                                                                                                                                                                                                                                                                                                                                                                                                                                                                                                                                                                                                                                                                                                                                                                                                                                                                           |           |           |           |          |          |           |           |                                                                                                                                                                                                                                                                                                                                                                                                                                                                                                                                                                                                                                                                                                                                                                                                                                                                                                                                                                                                                                                                                                                                                  |      |           |           |          |      |           |           |           |      |           |          |          |      |           |           |          |      |           |           |          |      |           |           |           |      |          |           |           |       |          |           |           |       |          |          |           |       |          |           |           |       |           |          |           |       |           |           |           |       |          |          |          |
| 5.Si                                                                                                                                                                                                                                                                                                                                                                                                                                                                                                                                                                                                                                                                                                                                                                                                                                                                                                                                                                                                                                                                                                                                            | -2.029669 | 1.171830  | 1.217411  |          |      |           |           |           |      |           |           |          |      |           |           |           |      |           |          |          |      |           |           |          |      |          |           |           |      |          |           |           |      |          |           |           |       |          |           |           |       |           |          |           |                                                                                                                                                                                                                                                                                                                                                                                                                                                                                                                                                                                                                                                                                                                                                                                                                                                                                                                                                                                           |           |           |           |          |          |           |           |                                                                                                                                                                                                                                                                                                                                                                                                                                                                                                                                                                                                                                                                                                                                                                                                                                                                                                                                                                                                                                                                                                                                                  |      |           |           |          |      |           |           |           |      |           |          |          |      |           |           |          |      |           |           |          |      |           |           |           |      |          |           |           |       |          |           |           |       |          |          |           |       |          |           |           |       |           |          |           |       |           |           |           |       |          |          |          |
| 6.Si                                                                                                                                                                                                                                                                                                                                                                                                                                                                                                                                                                                                                                                                                                                                                                                                                                                                                                                                                                                                                                                                                                                                            | -2.029669 | -1.171830 | 1.217411  |          |      |           |           |           |      |           |           |          |      |           |           |           |      |           |          |          |      |           |           |          |      |          |           |           |      |          |           |           |      |          |           |           |       |          |           |           |       |           |          |           |                                                                                                                                                                                                                                                                                                                                                                                                                                                                                                                                                                                                                                                                                                                                                                                                                                                                                                                                                                                           |           |           |           |          |          |           |           |                                                                                                                                                                                                                                                                                                                                                                                                                                                                                                                                                                                                                                                                                                                                                                                                                                                                                                                                                                                                                                                                                                                                                  |      |           |           |          |      |           |           |           |      |           |          |          |      |           |           |          |      |           |           |          |      |           |           |           |      |          |           |           |       |          |           |           |       |          |          |           |       |          |           |           |       |           |          |           |       |           |           |           |       |          |          |          |
| 7.Si                                                                                                                                                                                                                                                                                                                                                                                                                                                                                                                                                                                                                                                                                                                                                                                                                                                                                                                                                                                                                                                                                                                                            | 2.029669  | 1.171830  | -1.217411 |          |      |           |           |           |      |           |           |          |      |           |           |           |      |           |          |          |      |           |           |          |      |          |           |           |      |          |           |           |      |          |           |           |       |          |           |           |       |           |          |           |                                                                                                                                                                                                                                                                                                                                                                                                                                                                                                                                                                                                                                                                                                                                                                                                                                                                                                                                                                                           |           |           |           |          |          |           |           |                                                                                                                                                                                                                                                                                                                                                                                                                                                                                                                                                                                                                                                                                                                                                                                                                                                                                                                                                                                                                                                                                                                                                  |      |           |           |          |      |           |           |           |      |           |          |          |      |           |           |          |      |           |           |          |      |           |           |           |      |          |           |           |       |          |           |           |       |          |          |           |       |          |           |           |       |           |          |           |       |           |           |           |       |          |          |          |
| 8.Si                                                                                                                                                                                                                                                                                                                                                                                                                                                                                                                                                                                                                                                                                                                                                                                                                                                                                                                                                                                                                                                                                                                                            | 2.029669  | -1.171830 | -1.217411 |          |      |           |           |           |      |           |           |          |      |           |           |           |      |           |          |          |      |           |           |          |      |          |           |           |      |          |           |           |      |          |           |           |       |          |           |           |       |           |          |           |                                                                                                                                                                                                                                                                                                                                                                                                                                                                                                                                                                                                                                                                                                                                                                                                                                                                                                                                                                                           |           |           |           |          |          |           |           |                                                                                                                                                                                                                                                                                                                                                                                                                                                                                                                                                                                                                                                                                                                                                                                                                                                                                                                                                                                                                                                                                                                                                  |      |           |           |          |      |           |           |           |      |           |          |          |      |           |           |          |      |           |           |          |      |           |           |           |      |          |           |           |       |          |           |           |       |          |          |           |       |          |           |           |       |           |          |           |       |           |           |           |       |          |          |          |
| 9.Si                                                                                                                                                                                                                                                                                                                                                                                                                                                                                                                                                                                                                                                                                                                                                                                                                                                                                                                                                                                                                                                                                                                                            | 0.000000  | 2.343660  | -1.217411 |          |      |           |           |           |      |           |           |          |      |           |           |           |      |           |          |          |      |           |           |          |      |          |           |           |      |          |           |           |      |          |           |           |       |          |           |           |       |           |          |           |                                                                                                                                                                                                                                                                                                                                                                                                                                                                                                                                                                                                                                                                                                                                                                                                                                                                                                                                                                                           |           |           |           |          |          |           |           |                                                                                                                                                                                                                                                                                                                                                                                                                                                                                                                                                                                                                                                                                                                                                                                                                                                                                                                                                                                                                                                                                                                                                  |      |           |           |          |      |           |           |           |      |           |          |          |      |           |           |          |      |           |           |          |      |           |           |           |      |          |           |           |       |          |           |           |       |          |          |           |       |          |           |           |       |           |          |           |       |           |           |           |       |          |          |          |
| 10.Si                                                                                                                                                                                                                                                                                                                                                                                                                                                                                                                                                                                                                                                                                                                                                                                                                                                                                                                                                                                                                                                                                                                                           | 0.000000  | -2.343660 | -1.217411 |          |      |           |           |           |      |           |           |          |      |           |           |           |      |           |          |          |      |           |           |          |      |          |           |           |      |          |           |           |      |          |           |           |       |          |           |           |       |           |          |           |                                                                                                                                                                                                                                                                                                                                                                                                                                                                                                                                                                                                                                                                                                                                                                                                                                                                                                                                                                                           |           |           |           |          |          |           |           |                                                                                                                                                                                                                                                                                                                                                                                                                                                                                                                                                                                                                                                                                                                                                                                                                                                                                                                                                                                                                                                                                                                                                  |      |           |           |          |      |           |           |           |      |           |          |          |      |           |           |          |      |           |           |          |      |           |           |           |      |          |           |           |       |          |           |           |       |          |          |           |       |          |           |           |       |           |          |           |       |           |           |           |       |          |          |          |
| 11.Si                                                                                                                                                                                                                                                                                                                                                                                                                                                                                                                                                                                                                                                                                                                                                                                                                                                                                                                                                                                                                                                                                                                                           | -2.029669 | 1.171830  | -1.217411 |          |      |           |           |           |      |           |           |          |      |           |           |           |      |           |          |          |      |           |           |          |      |          |           |           |      |          |           |           |      |          |           |           |       |          |           |           |       |           |          |           |                                                                                                                                                                                                                                                                                                                                                                                                                                                                                                                                                                                                                                                                                                                                                                                                                                                                                                                                                                                           |           |           |           |          |          |           |           |                                                                                                                                                                                                                                                                                                                                                                                                                                                                                                                                                                                                                                                                                                                                                                                                                                                                                                                                                                                                                                                                                                                                                  |      |           |           |          |      |           |           |           |      |           |          |          |      |           |           |          |      |           |           |          |      |           |           |           |      |          |           |           |       |          |           |           |       |          |          |           |       |          |           |           |       |           |          |           |       |           |           |           |       |          |          |          |
| 12.Si                                                                                                                                                                                                                                                                                                                                                                                                                                                                                                                                                                                                                                                                                                                                                                                                                                                                                                                                                                                                                                                                                                                                           | -2.029669 | -1.171830 | -1.217411 |          |      |           |           |           |      |           |           |          |      |           |           |           |      |           |          |          |      |           |           |          |      |          |           |           |      |          |           |           |      |          |           |           |       |          |           |           |       |           |          |           |                                                                                                                                                                                                                                                                                                                                                                                                                                                                                                                                                                                                                                                                                                                                                                                                                                                                                                                                                                                           |           |           |           |          |          |           |           |                                                                                                                                                                                                                                                                                                                                                                                                                                                                                                                                                                                                                                                                                                                                                                                                                                                                                                                                                                                                                                                                                                                                                  |      |           |           |          |      |           |           |           |      |           |          |          |      |           |           |          |      |           |           |          |      |           |           |           |      |          |           |           |       |          |           |           |       |          |          |           |       |          |           |           |       |           |          |           |       |           |           |           |       |          |          |          |
| 13.Cr                                                                                                                                                                                                                                                                                                                                                                                                                                                                                                                                                                                                                                                                                                                                                                                                                                                                                                                                                                                                                                                                                                                                           | 0.000000  | 0.000000  | 0.000000  |          |      |           |           |           |      |           |           |          |      |           |           |           |      |           |          |          |      |           |           |          |      |          |           |           |      |          |           |           |      |          |           |           |       |          |           |           |       |           |          |           |                                                                                                                                                                                                                                                                                                                                                                                                                                                                                                                                                                                                                                                                                                                                                                                                                                                                                                                                                                                           |           |           |           |          |          |           |           |                                                                                                                                                                                                                                                                                                                                                                                                                                                                                                                                                                                                                                                                                                                                                                                                                                                                                                                                                                                                                                                                                                                                                  |      |           |           |          |      |           |           |           |      |           |          |          |      |           |           |          |      |           |           |          |      |           |           |           |      |          |           |           |       |          |           |           |       |          |          |           |       |          |           |           |       |           |          |           |       |           |           |           |       |          |          |          |
| <p><b><sup>3</sup>E<sub>2g</sub>, BLYP functional, E=-54.91279167 eV</b></p> <table border="1"> <tbody> <tr><td>1.Si</td><td>2.056629</td><td>1.187395</td><td>1.217065</td></tr> <tr><td>2.Si</td><td>2.056629</td><td>-1.187395</td><td>1.217065</td></tr> <tr><td>3.Si</td><td>0.000000</td><td>2.374790</td><td>1.217065</td></tr> <tr><td>4.Si</td><td>0.000000</td><td>-2.374790</td><td>1.217065</td></tr> <tr><td>5.Si</td><td>-2.056629</td><td>1.187395</td><td>1.217065</td></tr> <tr><td>6.Si</td><td>-2.056629</td><td>-1.187395</td><td>1.217065</td></tr> <tr><td>7.Si</td><td>2.056629</td><td>1.187395</td><td>-1.217065</td></tr> <tr><td>8.Si</td><td>2.056629</td><td>-1.187395</td><td>-1.217065</td></tr> <tr><td>9.Si</td><td>0.000000</td><td>2.374790</td><td>-1.217065</td></tr> <tr><td>10.Si</td><td>0.000000</td><td>-2.374790</td><td>-1.217065</td></tr> <tr><td>11.Si</td><td>-2.056629</td><td>1.187395</td><td>-1.217065</td></tr> <tr><td>12.Si</td><td>-2.056629</td><td>-1.187395</td><td>-1.217065</td></tr> <tr><td>13.Cr</td><td>0.000000</td><td>0.000000</td><td>0.000000</td></tr> </tbody> </table> | 1.Si      | 2.056629  | 1.187395  | 1.217065 | 2.Si | 2.056629  | -1.187395 | 1.217065  | 3.Si | 0.000000  | 2.374790  | 1.217065 | 4.Si | 0.000000  | -2.374790 | 1.217065  | 5.Si | -2.056629 | 1.187395 | 1.217065 | 6.Si | -2.056629 | -1.187395 | 1.217065 | 7.Si | 2.056629 | 1.187395  | -1.217065 | 8.Si | 2.056629 | -1.187395 | -1.217065 | 9.Si | 0.000000 | 2.374790  | -1.217065 | 10.Si | 0.000000 | -2.374790 | -1.217065 | 11.Si | -2.056629 | 1.187395 | -1.217065 | 12.Si                                                                                                                                                                                                                                                                                                                                                                                                                                                                                                                                                                                                                                                                                                                                                                                                                                                                                                                                                                                     | -2.056629 | -1.187395 | -1.217065 | 13.Cr    | 0.000000 | 0.000000  | 0.000000  | <p><b><sup>3</sup>E<sub>2g</sub>, B3LYP functional, E=-70.02999189 eV</b></p> <table border="1"> <tbody> <tr><td>1.Si</td><td>2.043987</td><td>1.180097</td><td>1.211505</td></tr> <tr><td>2.Si</td><td>2.043987</td><td>-1.180097</td><td>1.211505</td></tr> <tr><td>3.Si</td><td>0.000000</td><td>2.360193</td><td>1.211505</td></tr> <tr><td>4.Si</td><td>0.000000</td><td>-2.360193</td><td>1.211505</td></tr> <tr><td>5.Si</td><td>-2.043987</td><td>1.180097</td><td>1.211505</td></tr> <tr><td>6.Si</td><td>-2.043987</td><td>-1.180097</td><td>1.211505</td></tr> <tr><td>7.Si</td><td>2.043987</td><td>1.180097</td><td>-1.211505</td></tr> <tr><td>8.Si</td><td>2.043987</td><td>-1.180097</td><td>-1.211505</td></tr> <tr><td>9.Si</td><td>0.000000</td><td>2.360193</td><td>-1.211505</td></tr> <tr><td>10.Si</td><td>0.000000</td><td>-2.360193</td><td>-1.211505</td></tr> <tr><td>11.Si</td><td>-2.043987</td><td>1.180097</td><td>-1.211505</td></tr> <tr><td>12.Si</td><td>-2.043987</td><td>-1.180097</td><td>-1.211505</td></tr> <tr><td>13.Cr</td><td>0.000000</td><td>0.000000</td><td>0.000000</td></tr> </tbody> </table> | 1.Si | 2.043987  | 1.180097  | 1.211505 | 2.Si | 2.043987  | -1.180097 | 1.211505  | 3.Si | 0.000000  | 2.360193 | 1.211505 | 4.Si | 0.000000  | -2.360193 | 1.211505 | 5.Si | -2.043987 | 1.180097  | 1.211505 | 6.Si | -2.043987 | -1.180097 | 1.211505  | 7.Si | 2.043987 | 1.180097  | -1.211505 | 8.Si  | 2.043987 | -1.180097 | -1.211505 | 9.Si  | 0.000000 | 2.360193 | -1.211505 | 10.Si | 0.000000 | -2.360193 | -1.211505 | 11.Si | -2.043987 | 1.180097 | -1.211505 | 12.Si | -2.043987 | -1.180097 | -1.211505 | 13.Cr | 0.000000 | 0.000000 | 0.000000 |
| 1.Si                                                                                                                                                                                                                                                                                                                                                                                                                                                                                                                                                                                                                                                                                                                                                                                                                                                                                                                                                                                                                                                                                                                                            | 2.056629  | 1.187395  | 1.217065  |          |      |           |           |           |      |           |           |          |      |           |           |           |      |           |          |          |      |           |           |          |      |          |           |           |      |          |           |           |      |          |           |           |       |          |           |           |       |           |          |           |                                                                                                                                                                                                                                                                                                                                                                                                                                                                                                                                                                                                                                                                                                                                                                                                                                                                                                                                                                                           |           |           |           |          |          |           |           |                                                                                                                                                                                                                                                                                                                                                                                                                                                                                                                                                                                                                                                                                                                                                                                                                                                                                                                                                                                                                                                                                                                                                  |      |           |           |          |      |           |           |           |      |           |          |          |      |           |           |          |      |           |           |          |      |           |           |           |      |          |           |           |       |          |           |           |       |          |          |           |       |          |           |           |       |           |          |           |       |           |           |           |       |          |          |          |
| 2.Si                                                                                                                                                                                                                                                                                                                                                                                                                                                                                                                                                                                                                                                                                                                                                                                                                                                                                                                                                                                                                                                                                                                                            | 2.056629  | -1.187395 | 1.217065  |          |      |           |           |           |      |           |           |          |      |           |           |           |      |           |          |          |      |           |           |          |      |          |           |           |      |          |           |           |      |          |           |           |       |          |           |           |       |           |          |           |                                                                                                                                                                                                                                                                                                                                                                                                                                                                                                                                                                                                                                                                                                                                                                                                                                                                                                                                                                                           |           |           |           |          |          |           |           |                                                                                                                                                                                                                                                                                                                                                                                                                                                                                                                                                                                                                                                                                                                                                                                                                                                                                                                                                                                                                                                                                                                                                  |      |           |           |          |      |           |           |           |      |           |          |          |      |           |           |          |      |           |           |          |      |           |           |           |      |          |           |           |       |          |           |           |       |          |          |           |       |          |           |           |       |           |          |           |       |           |           |           |       |          |          |          |
| 3.Si                                                                                                                                                                                                                                                                                                                                                                                                                                                                                                                                                                                                                                                                                                                                                                                                                                                                                                                                                                                                                                                                                                                                            | 0.000000  | 2.374790  | 1.217065  |          |      |           |           |           |      |           |           |          |      |           |           |           |      |           |          |          |      |           |           |          |      |          |           |           |      |          |           |           |      |          |           |           |       |          |           |           |       |           |          |           |                                                                                                                                                                                                                                                                                                                                                                                                                                                                                                                                                                                                                                                                                                                                                                                                                                                                                                                                                                                           |           |           |           |          |          |           |           |                                                                                                                                                                                                                                                                                                                                                                                                                                                                                                                                                                                                                                                                                                                                                                                                                                                                                                                                                                                                                                                                                                                                                  |      |           |           |          |      |           |           |           |      |           |          |          |      |           |           |          |      |           |           |          |      |           |           |           |      |          |           |           |       |          |           |           |       |          |          |           |       |          |           |           |       |           |          |           |       |           |           |           |       |          |          |          |
| 4.Si                                                                                                                                                                                                                                                                                                                                                                                                                                                                                                                                                                                                                                                                                                                                                                                                                                                                                                                                                                                                                                                                                                                                            | 0.000000  | -2.374790 | 1.217065  |          |      |           |           |           |      |           |           |          |      |           |           |           |      |           |          |          |      |           |           |          |      |          |           |           |      |          |           |           |      |          |           |           |       |          |           |           |       |           |          |           |                                                                                                                                                                                                                                                                                                                                                                                                                                                                                                                                                                                                                                                                                                                                                                                                                                                                                                                                                                                           |           |           |           |          |          |           |           |                                                                                                                                                                                                                                                                                                                                                                                                                                                                                                                                                                                                                                                                                                                                                                                                                                                                                                                                                                                                                                                                                                                                                  |      |           |           |          |      |           |           |           |      |           |          |          |      |           |           |          |      |           |           |          |      |           |           |           |      |          |           |           |       |          |           |           |       |          |          |           |       |          |           |           |       |           |          |           |       |           |           |           |       |          |          |          |
| 5.Si                                                                                                                                                                                                                                                                                                                                                                                                                                                                                                                                                                                                                                                                                                                                                                                                                                                                                                                                                                                                                                                                                                                                            | -2.056629 | 1.187395  | 1.217065  |          |      |           |           |           |      |           |           |          |      |           |           |           |      |           |          |          |      |           |           |          |      |          |           |           |      |          |           |           |      |          |           |           |       |          |           |           |       |           |          |           |                                                                                                                                                                                                                                                                                                                                                                                                                                                                                                                                                                                                                                                                                                                                                                                                                                                                                                                                                                                           |           |           |           |          |          |           |           |                                                                                                                                                                                                                                                                                                                                                                                                                                                                                                                                                                                                                                                                                                                                                                                                                                                                                                                                                                                                                                                                                                                                                  |      |           |           |          |      |           |           |           |      |           |          |          |      |           |           |          |      |           |           |          |      |           |           |           |      |          |           |           |       |          |           |           |       |          |          |           |       |          |           |           |       |           |          |           |       |           |           |           |       |          |          |          |
| 6.Si                                                                                                                                                                                                                                                                                                                                                                                                                                                                                                                                                                                                                                                                                                                                                                                                                                                                                                                                                                                                                                                                                                                                            | -2.056629 | -1.187395 | 1.217065  |          |      |           |           |           |      |           |           |          |      |           |           |           |      |           |          |          |      |           |           |          |      |          |           |           |      |          |           |           |      |          |           |           |       |          |           |           |       |           |          |           |                                                                                                                                                                                                                                                                                                                                                                                                                                                                                                                                                                                                                                                                                                                                                                                                                                                                                                                                                                                           |           |           |           |          |          |           |           |                                                                                                                                                                                                                                                                                                                                                                                                                                                                                                                                                                                                                                                                                                                                                                                                                                                                                                                                                                                                                                                                                                                                                  |      |           |           |          |      |           |           |           |      |           |          |          |      |           |           |          |      |           |           |          |      |           |           |           |      |          |           |           |       |          |           |           |       |          |          |           |       |          |           |           |       |           |          |           |       |           |           |           |       |          |          |          |
| 7.Si                                                                                                                                                                                                                                                                                                                                                                                                                                                                                                                                                                                                                                                                                                                                                                                                                                                                                                                                                                                                                                                                                                                                            | 2.056629  | 1.187395  | -1.217065 |          |      |           |           |           |      |           |           |          |      |           |           |           |      |           |          |          |      |           |           |          |      |          |           |           |      |          |           |           |      |          |           |           |       |          |           |           |       |           |          |           |                                                                                                                                                                                                                                                                                                                                                                                                                                                                                                                                                                                                                                                                                                                                                                                                                                                                                                                                                                                           |           |           |           |          |          |           |           |                                                                                                                                                                                                                                                                                                                                                                                                                                                                                                                                                                                                                                                                                                                                                                                                                                                                                                                                                                                                                                                                                                                                                  |      |           |           |          |      |           |           |           |      |           |          |          |      |           |           |          |      |           |           |          |      |           |           |           |      |          |           |           |       |          |           |           |       |          |          |           |       |          |           |           |       |           |          |           |       |           |           |           |       |          |          |          |
| 8.Si                                                                                                                                                                                                                                                                                                                                                                                                                                                                                                                                                                                                                                                                                                                                                                                                                                                                                                                                                                                                                                                                                                                                            | 2.056629  | -1.187395 | -1.217065 |          |      |           |           |           |      |           |           |          |      |           |           |           |      |           |          |          |      |           |           |          |      |          |           |           |      |          |           |           |      |          |           |           |       |          |           |           |       |           |          |           |                                                                                                                                                                                                                                                                                                                                                                                                                                                                                                                                                                                                                                                                                                                                                                                                                                                                                                                                                                                           |           |           |           |          |          |           |           |                                                                                                                                                                                                                                                                                                                                                                                                                                                                                                                                                                                                                                                                                                                                                                                                                                                                                                                                                                                                                                                                                                                                                  |      |           |           |          |      |           |           |           |      |           |          |          |      |           |           |          |      |           |           |          |      |           |           |           |      |          |           |           |       |          |           |           |       |          |          |           |       |          |           |           |       |           |          |           |       |           |           |           |       |          |          |          |
| 9.Si                                                                                                                                                                                                                                                                                                                                                                                                                                                                                                                                                                                                                                                                                                                                                                                                                                                                                                                                                                                                                                                                                                                                            | 0.000000  | 2.374790  | -1.217065 |          |      |           |           |           |      |           |           |          |      |           |           |           |      |           |          |          |      |           |           |          |      |          |           |           |      |          |           |           |      |          |           |           |       |          |           |           |       |           |          |           |                                                                                                                                                                                                                                                                                                                                                                                                                                                                                                                                                                                                                                                                                                                                                                                                                                                                                                                                                                                           |           |           |           |          |          |           |           |                                                                                                                                                                                                                                                                                                                                                                                                                                                                                                                                                                                                                                                                                                                                                                                                                                                                                                                                                                                                                                                                                                                                                  |      |           |           |          |      |           |           |           |      |           |          |          |      |           |           |          |      |           |           |          |      |           |           |           |      |          |           |           |       |          |           |           |       |          |          |           |       |          |           |           |       |           |          |           |       |           |           |           |       |          |          |          |
| 10.Si                                                                                                                                                                                                                                                                                                                                                                                                                                                                                                                                                                                                                                                                                                                                                                                                                                                                                                                                                                                                                                                                                                                                           | 0.000000  | -2.374790 | -1.217065 |          |      |           |           |           |      |           |           |          |      |           |           |           |      |           |          |          |      |           |           |          |      |          |           |           |      |          |           |           |      |          |           |           |       |          |           |           |       |           |          |           |                                                                                                                                                                                                                                                                                                                                                                                                                                                                                                                                                                                                                                                                                                                                                                                                                                                                                                                                                                                           |           |           |           |          |          |           |           |                                                                                                                                                                                                                                                                                                                                                                                                                                                                                                                                                                                                                                                                                                                                                                                                                                                                                                                                                                                                                                                                                                                                                  |      |           |           |          |      |           |           |           |      |           |          |          |      |           |           |          |      |           |           |          |      |           |           |           |      |          |           |           |       |          |           |           |       |          |          |           |       |          |           |           |       |           |          |           |       |           |           |           |       |          |          |          |
| 11.Si                                                                                                                                                                                                                                                                                                                                                                                                                                                                                                                                                                                                                                                                                                                                                                                                                                                                                                                                                                                                                                                                                                                                           | -2.056629 | 1.187395  | -1.217065 |          |      |           |           |           |      |           |           |          |      |           |           |           |      |           |          |          |      |           |           |          |      |          |           |           |      |          |           |           |      |          |           |           |       |          |           |           |       |           |          |           |                                                                                                                                                                                                                                                                                                                                                                                                                                                                                                                                                                                                                                                                                                                                                                                                                                                                                                                                                                                           |           |           |           |          |          |           |           |                                                                                                                                                                                                                                                                                                                                                                                                                                                                                                                                                                                                                                                                                                                                                                                                                                                                                                                                                                                                                                                                                                                                                  |      |           |           |          |      |           |           |           |      |           |          |          |      |           |           |          |      |           |           |          |      |           |           |           |      |          |           |           |       |          |           |           |       |          |          |           |       |          |           |           |       |           |          |           |       |           |           |           |       |          |          |          |
| 12.Si                                                                                                                                                                                                                                                                                                                                                                                                                                                                                                                                                                                                                                                                                                                                                                                                                                                                                                                                                                                                                                                                                                                                           | -2.056629 | -1.187395 | -1.217065 |          |      |           |           |           |      |           |           |          |      |           |           |           |      |           |          |          |      |           |           |          |      |          |           |           |      |          |           |           |      |          |           |           |       |          |           |           |       |           |          |           |                                                                                                                                                                                                                                                                                                                                                                                                                                                                                                                                                                                                                                                                                                                                                                                                                                                                                                                                                                                           |           |           |           |          |          |           |           |                                                                                                                                                                                                                                                                                                                                                                                                                                                                                                                                                                                                                                                                                                                                                                                                                                                                                                                                                                                                                                                                                                                                                  |      |           |           |          |      |           |           |           |      |           |          |          |      |           |           |          |      |           |           |          |      |           |           |           |      |          |           |           |       |          |           |           |       |          |          |           |       |          |           |           |       |           |          |           |       |           |           |           |       |          |          |          |
| 13.Cr                                                                                                                                                                                                                                                                                                                                                                                                                                                                                                                                                                                                                                                                                                                                                                                                                                                                                                                                                                                                                                                                                                                                           | 0.000000  | 0.000000  | 0.000000  |          |      |           |           |           |      |           |           |          |      |           |           |           |      |           |          |          |      |           |           |          |      |          |           |           |      |          |           |           |      |          |           |           |       |          |           |           |       |           |          |           |                                                                                                                                                                                                                                                                                                                                                                                                                                                                                                                                                                                                                                                                                                                                                                                                                                                                                                                                                                                           |           |           |           |          |          |           |           |                                                                                                                                                                                                                                                                                                                                                                                                                                                                                                                                                                                                                                                                                                                                                                                                                                                                                                                                                                                                                                                                                                                                                  |      |           |           |          |      |           |           |           |      |           |          |          |      |           |           |          |      |           |           |          |      |           |           |           |      |          |           |           |       |          |           |           |       |          |          |           |       |          |           |           |       |           |          |           |       |           |           |           |       |          |          |          |
| 1.Si                                                                                                                                                                                                                                                                                                                                                                                                                                                                                                                                                                                                                                                                                                                                                                                                                                                                                                                                                                                                                                                                                                                                            | 2.043987  | 1.180097  | 1.211505  |          |      |           |           |           |      |           |           |          |      |           |           |           |      |           |          |          |      |           |           |          |      |          |           |           |      |          |           |           |      |          |           |           |       |          |           |           |       |           |          |           |                                                                                                                                                                                                                                                                                                                                                                                                                                                                                                                                                                                                                                                                                                                                                                                                                                                                                                                                                                                           |           |           |           |          |          |           |           |                                                                                                                                                                                                                                                                                                                                                                                                                                                                                                                                                                                                                                                                                                                                                                                                                                                                                                                                                                                                                                                                                                                                                  |      |           |           |          |      |           |           |           |      |           |          |          |      |           |           |          |      |           |           |          |      |           |           |           |      |          |           |           |       |          |           |           |       |          |          |           |       |          |           |           |       |           |          |           |       |           |           |           |       |          |          |          |
| 2.Si                                                                                                                                                                                                                                                                                                                                                                                                                                                                                                                                                                                                                                                                                                                                                                                                                                                                                                                                                                                                                                                                                                                                            | 2.043987  | -1.180097 | 1.211505  |          |      |           |           |           |      |           |           |          |      |           |           |           |      |           |          |          |      |           |           |          |      |          |           |           |      |          |           |           |      |          |           |           |       |          |           |           |       |           |          |           |                                                                                                                                                                                                                                                                                                                                                                                                                                                                                                                                                                                                                                                                                                                                                                                                                                                                                                                                                                                           |           |           |           |          |          |           |           |                                                                                                                                                                                                                                                                                                                                                                                                                                                                                                                                                                                                                                                                                                                                                                                                                                                                                                                                                                                                                                                                                                                                                  |      |           |           |          |      |           |           |           |      |           |          |          |      |           |           |          |      |           |           |          |      |           |           |           |      |          |           |           |       |          |           |           |       |          |          |           |       |          |           |           |       |           |          |           |       |           |           |           |       |          |          |          |
| 3.Si                                                                                                                                                                                                                                                                                                                                                                                                                                                                                                                                                                                                                                                                                                                                                                                                                                                                                                                                                                                                                                                                                                                                            | 0.000000  | 2.360193  | 1.211505  |          |      |           |           |           |      |           |           |          |      |           |           |           |      |           |          |          |      |           |           |          |      |          |           |           |      |          |           |           |      |          |           |           |       |          |           |           |       |           |          |           |                                                                                                                                                                                                                                                                                                                                                                                                                                                                                                                                                                                                                                                                                                                                                                                                                                                                                                                                                                                           |           |           |           |          |          |           |           |                                                                                                                                                                                                                                                                                                                                                                                                                                                                                                                                                                                                                                                                                                                                                                                                                                                                                                                                                                                                                                                                                                                                                  |      |           |           |          |      |           |           |           |      |           |          |          |      |           |           |          |      |           |           |          |      |           |           |           |      |          |           |           |       |          |           |           |       |          |          |           |       |          |           |           |       |           |          |           |       |           |           |           |       |          |          |          |
| 4.Si                                                                                                                                                                                                                                                                                                                                                                                                                                                                                                                                                                                                                                                                                                                                                                                                                                                                                                                                                                                                                                                                                                                                            | 0.000000  | -2.360193 | 1.211505  |          |      |           |           |           |      |           |           |          |      |           |           |           |      |           |          |          |      |           |           |          |      |          |           |           |      |          |           |           |      |          |           |           |       |          |           |           |       |           |          |           |                                                                                                                                                                                                                                                                                                                                                                                                                                                                                                                                                                                                                                                                                                                                                                                                                                                                                                                                                                                           |           |           |           |          |          |           |           |                                                                                                                                                                                                                                                                                                                                                                                                                                                                                                                                                                                                                                                                                                                                                                                                                                                                                                                                                                                                                                                                                                                                                  |      |           |           |          |      |           |           |           |      |           |          |          |      |           |           |          |      |           |           |          |      |           |           |           |      |          |           |           |       |          |           |           |       |          |          |           |       |          |           |           |       |           |          |           |       |           |           |           |       |          |          |          |
| 5.Si                                                                                                                                                                                                                                                                                                                                                                                                                                                                                                                                                                                                                                                                                                                                                                                                                                                                                                                                                                                                                                                                                                                                            | -2.043987 | 1.180097  | 1.211505  |          |      |           |           |           |      |           |           |          |      |           |           |           |      |           |          |          |      |           |           |          |      |          |           |           |      |          |           |           |      |          |           |           |       |          |           |           |       |           |          |           |                                                                                                                                                                                                                                                                                                                                                                                                                                                                                                                                                                                                                                                                                                                                                                                                                                                                                                                                                                                           |           |           |           |          |          |           |           |                                                                                                                                                                                                                                                                                                                                                                                                                                                                                                                                                                                                                                                                                                                                                                                                                                                                                                                                                                                                                                                                                                                                                  |      |           |           |          |      |           |           |           |      |           |          |          |      |           |           |          |      |           |           |          |      |           |           |           |      |          |           |           |       |          |           |           |       |          |          |           |       |          |           |           |       |           |          |           |       |           |           |           |       |          |          |          |
| 6.Si                                                                                                                                                                                                                                                                                                                                                                                                                                                                                                                                                                                                                                                                                                                                                                                                                                                                                                                                                                                                                                                                                                                                            | -2.043987 | -1.180097 | 1.211505  |          |      |           |           |           |      |           |           |          |      |           |           |           |      |           |          |          |      |           |           |          |      |          |           |           |      |          |           |           |      |          |           |           |       |          |           |           |       |           |          |           |                                                                                                                                                                                                                                                                                                                                                                                                                                                                                                                                                                                                                                                                                                                                                                                                                                                                                                                                                                                           |           |           |           |          |          |           |           |                                                                                                                                                                                                                                                                                                                                                                                                                                                                                                                                                                                                                                                                                                                                                                                                                                                                                                                                                                                                                                                                                                                                                  |      |           |           |          |      |           |           |           |      |           |          |          |      |           |           |          |      |           |           |          |      |           |           |           |      |          |           |           |       |          |           |           |       |          |          |           |       |          |           |           |       |           |          |           |       |           |           |           |       |          |          |          |
| 7.Si                                                                                                                                                                                                                                                                                                                                                                                                                                                                                                                                                                                                                                                                                                                                                                                                                                                                                                                                                                                                                                                                                                                                            | 2.043987  | 1.180097  | -1.211505 |          |      |           |           |           |      |           |           |          |      |           |           |           |      |           |          |          |      |           |           |          |      |          |           |           |      |          |           |           |      |          |           |           |       |          |           |           |       |           |          |           |                                                                                                                                                                                                                                                                                                                                                                                                                                                                                                                                                                                                                                                                                                                                                                                                                                                                                                                                                                                           |           |           |           |          |          |           |           |                                                                                                                                                                                                                                                                                                                                                                                                                                                                                                                                                                                                                                                                                                                                                                                                                                                                                                                                                                                                                                                                                                                                                  |      |           |           |          |      |           |           |           |      |           |          |          |      |           |           |          |      |           |           |          |      |           |           |           |      |          |           |           |       |          |           |           |       |          |          |           |       |          |           |           |       |           |          |           |       |           |           |           |       |          |          |          |
| 8.Si                                                                                                                                                                                                                                                                                                                                                                                                                                                                                                                                                                                                                                                                                                                                                                                                                                                                                                                                                                                                                                                                                                                                            | 2.043987  | -1.180097 | -1.211505 |          |      |           |           |           |      |           |           |          |      |           |           |           |      |           |          |          |      |           |           |          |      |          |           |           |      |          |           |           |      |          |           |           |       |          |           |           |       |           |          |           |                                                                                                                                                                                                                                                                                                                                                                                                                                                                                                                                                                                                                                                                                                                                                                                                                                                                                                                                                                                           |           |           |           |          |          |           |           |                                                                                                                                                                                                                                                                                                                                                                                                                                                                                                                                                                                                                                                                                                                                                                                                                                                                                                                                                                                                                                                                                                                                                  |      |           |           |          |      |           |           |           |      |           |          |          |      |           |           |          |      |           |           |          |      |           |           |           |      |          |           |           |       |          |           |           |       |          |          |           |       |          |           |           |       |           |          |           |       |           |           |           |       |          |          |          |
| 9.Si                                                                                                                                                                                                                                                                                                                                                                                                                                                                                                                                                                                                                                                                                                                                                                                                                                                                                                                                                                                                                                                                                                                                            | 0.000000  | 2.360193  | -1.211505 |          |      |           |           |           |      |           |           |          |      |           |           |           |      |           |          |          |      |           |           |          |      |          |           |           |      |          |           |           |      |          |           |           |       |          |           |           |       |           |          |           |                                                                                                                                                                                                                                                                                                                                                                                                                                                                                                                                                                                                                                                                                                                                                                                                                                                                                                                                                                                           |           |           |           |          |          |           |           |                                                                                                                                                                                                                                                                                                                                                                                                                                                                                                                                                                                                                                                                                                                                                                                                                                                                                                                                                                                                                                                                                                                                                  |      |           |           |          |      |           |           |           |      |           |          |          |      |           |           |          |      |           |           |          |      |           |           |           |      |          |           |           |       |          |           |           |       |          |          |           |       |          |           |           |       |           |          |           |       |           |           |           |       |          |          |          |
| 10.Si                                                                                                                                                                                                                                                                                                                                                                                                                                                                                                                                                                                                                                                                                                                                                                                                                                                                                                                                                                                                                                                                                                                                           | 0.000000  | -2.360193 | -1.211505 |          |      |           |           |           |      |           |           |          |      |           |           |           |      |           |          |          |      |           |           |          |      |          |           |           |      |          |           |           |      |          |           |           |       |          |           |           |       |           |          |           |                                                                                                                                                                                                                                                                                                                                                                                                                                                                                                                                                                                                                                                                                                                                                                                                                                                                                                                                                                                           |           |           |           |          |          |           |           |                                                                                                                                                                                                                                                                                                                                                                                                                                                                                                                                                                                                                                                                                                                                                                                                                                                                                                                                                                                                                                                                                                                                                  |      |           |           |          |      |           |           |           |      |           |          |          |      |           |           |          |      |           |           |          |      |           |           |           |      |          |           |           |       |          |           |           |       |          |          |           |       |          |           |           |       |           |          |           |       |           |           |           |       |          |          |          |
| 11.Si                                                                                                                                                                                                                                                                                                                                                                                                                                                                                                                                                                                                                                                                                                                                                                                                                                                                                                                                                                                                                                                                                                                                           | -2.043987 | 1.180097  | -1.211505 |          |      |           |           |           |      |           |           |          |      |           |           |           |      |           |          |          |      |           |           |          |      |          |           |           |      |          |           |           |      |          |           |           |       |          |           |           |       |           |          |           |                                                                                                                                                                                                                                                                                                                                                                                                                                                                                                                                                                                                                                                                                                                                                                                                                                                                                                                                                                                           |           |           |           |          |          |           |           |                                                                                                                                                                                                                                                                                                                                                                                                                                                                                                                                                                                                                                                                                                                                                                                                                                                                                                                                                                                                                                                                                                                                                  |      |           |           |          |      |           |           |           |      |           |          |          |      |           |           |          |      |           |           |          |      |           |           |           |      |          |           |           |       |          |           |           |       |          |          |           |       |          |           |           |       |           |          |           |       |           |           |           |       |          |          |          |
| 12.Si                                                                                                                                                                                                                                                                                                                                                                                                                                                                                                                                                                                                                                                                                                                                                                                                                                                                                                                                                                                                                                                                                                                                           | -2.043987 | -1.180097 | -1.211505 |          |      |           |           |           |      |           |           |          |      |           |           |           |      |           |          |          |      |           |           |          |      |          |           |           |      |          |           |           |      |          |           |           |       |          |           |           |       |           |          |           |                                                                                                                                                                                                                                                                                                                                                                                                                                                                                                                                                                                                                                                                                                                                                                                                                                                                                                                                                                                           |           |           |           |          |          |           |           |                                                                                                                                                                                                                                                                                                                                                                                                                                                                                                                                                                                                                                                                                                                                                                                                                                                                                                                                                                                                                                                                                                                                                  |      |           |           |          |      |           |           |           |      |           |          |          |      |           |           |          |      |           |           |          |      |           |           |           |      |          |           |           |       |          |           |           |       |          |          |           |       |          |           |           |       |           |          |           |       |           |           |           |       |          |          |          |
| 13.Cr                                                                                                                                                                                                                                                                                                                                                                                                                                                                                                                                                                                                                                                                                                                                                                                                                                                                                                                                                                                                                                                                                                                                           | 0.000000  | 0.000000  | 0.000000  |          |      |           |           |           |      |           |           |          |      |           |           |           |      |           |          |          |      |           |           |          |      |          |           |           |      |          |           |           |      |          |           |           |       |          |           |           |       |           |          |           |                                                                                                                                                                                                                                                                                                                                                                                                                                                                                                                                                                                                                                                                                                                                                                                                                                                                                                                                                                                           |           |           |           |          |          |           |           |                                                                                                                                                                                                                                                                                                                                                                                                                                                                                                                                                                                                                                                                                                                                                                                                                                                                                                                                                                                                                                                                                                                                                  |      |           |           |          |      |           |           |           |      |           |          |          |      |           |           |          |      |           |           |          |      |           |           |           |      |          |           |           |       |          |           |           |       |          |          |           |       |          |           |           |       |           |          |           |       |           |           |           |       |          |          |          |
| <p><b><sup>3</sup>A<sub>g</sub>, BLYP functional, E=-55.00738839 eV</b></p> <table border="1"> <tbody> <tr><td>1.Si</td><td>-1.269391</td><td>-2.447860</td><td>0.000000</td></tr> <tr><td>2.Si</td><td>-1.201071</td><td>-1.186005</td><td>-1.993903</td></tr> <tr><td>3.Si</td><td>-1.201071</td><td>-1.186005</td><td>1.993903</td></tr> <tr><td>4.Si</td><td>-1.206490</td><td>1.220840</td><td>-2.043973</td></tr> <tr><td>5.Si</td><td>-1.206490</td><td>1.220840</td><td>2.043973</td></tr> <tr><td>6.Si</td><td>-1.225763</td><td>2.401961</td><td>0.000000</td></tr> <tr><td>7.Si</td><td>1.225763</td><td>-2.401961</td><td>0.000000</td></tr> <tr><td>8.Si</td><td>1.206490</td><td>-1.220840</td><td>-2.043973</td></tr> <tr><td>9.Si</td><td>1.206490</td><td>-1.220840</td><td>2.043973</td></tr> <tr><td>10.Si</td><td>1.201071</td><td>1.186005</td><td>-1.993903</td></tr> <tr><td>11.Si</td><td>1.201071</td><td>1.186005</td><td>1.993903</td></tr> </tbody> </table>                                                                                                                                                        | 1.Si      | -1.269391 | -2.447860 | 0.000000 | 2.Si | -1.201071 | -1.186005 | -1.993903 | 3.Si | -1.201071 | -1.186005 | 1.993903 | 4.Si | -1.206490 | 1.220840  | -2.043973 | 5.Si | -1.206490 | 1.220840 | 2.043973 | 6.Si | -1.225763 | 2.401961  | 0.000000 | 7.Si | 1.225763 | -2.401961 | 0.000000  | 8.Si | 1.206490 | -1.220840 | -2.043973 | 9.Si | 1.206490 | -1.220840 | 2.043973  | 10.Si | 1.201071 | 1.186005  | -1.993903 | 11.Si | 1.201071  | 1.186005 | 1.993903  | <p><b><sup>3</sup>A<sub>g</sub>, B3LYP functional, E=-70.42093292 eV</b></p> <table border="1"> <tbody> <tr><td>1.Si</td><td>-1.290281</td><td>-2.476968</td><td>0.000000</td></tr> <tr><td>2.Si</td><td>-1.144890</td><td>-1.175599</td><td>-1.970498</td></tr> <tr><td>3.Si</td><td>-1.144890</td><td>-1.175599</td><td>1.970498</td></tr> <tr><td>4.Si</td><td>-1.251151</td><td>1.199363</td><td>-2.090099</td></tr> <tr><td>5.Si</td><td>-1.251151</td><td>1.199363</td><td>2.090099</td></tr> <tr><td>6.Si</td><td>-1.123497</td><td>2.340300</td><td>0.000000</td></tr> <tr><td>7.Si</td><td>1.123497</td><td>-2.340300</td><td>0.000000</td></tr> <tr><td>8.Si</td><td>1.251151</td><td>-1.199363</td><td>-2.090099</td></tr> <tr><td>9.Si</td><td>1.251151</td><td>-1.199363</td><td>2.090099</td></tr> <tr><td>10.Si</td><td>1.144890</td><td>1.175599</td><td>-1.970498</td></tr> <tr><td>11.Si</td><td>1.144890</td><td>1.175599</td><td>1.970498</td></tr> </tbody> </table> | 1.Si      | -1.290281 | -2.476968 | 0.000000 | 2.Si     | -1.144890 | -1.175599 | -1.970498                                                                                                                                                                                                                                                                                                                                                                                                                                                                                                                                                                                                                                                                                                                                                                                                                                                                                                                                                                                                                                                                                                                                        | 3.Si | -1.144890 | -1.175599 | 1.970498 | 4.Si | -1.251151 | 1.199363  | -2.090099 | 5.Si | -1.251151 | 1.199363 | 2.090099 | 6.Si | -1.123497 | 2.340300  | 0.000000 | 7.Si | 1.123497  | -2.340300 | 0.000000 | 8.Si | 1.251151  | -1.199363 | -2.090099 | 9.Si | 1.251151 | -1.199363 | 2.090099  | 10.Si | 1.144890 | 1.175599  | -1.970498 | 11.Si | 1.144890 | 1.175599 | 1.970498  |       |          |           |           |       |           |          |           |       |           |           |           |       |          |          |          |
| 1.Si                                                                                                                                                                                                                                                                                                                                                                                                                                                                                                                                                                                                                                                                                                                                                                                                                                                                                                                                                                                                                                                                                                                                            | -1.269391 | -2.447860 | 0.000000  |          |      |           |           |           |      |           |           |          |      |           |           |           |      |           |          |          |      |           |           |          |      |          |           |           |      |          |           |           |      |          |           |           |       |          |           |           |       |           |          |           |                                                                                                                                                                                                                                                                                                                                                                                                                                                                                                                                                                                                                                                                                                                                                                                                                                                                                                                                                                                           |           |           |           |          |          |           |           |                                                                                                                                                                                                                                                                                                                                                                                                                                                                                                                                                                                                                                                                                                                                                                                                                                                                                                                                                                                                                                                                                                                                                  |      |           |           |          |      |           |           |           |      |           |          |          |      |           |           |          |      |           |           |          |      |           |           |           |      |          |           |           |       |          |           |           |       |          |          |           |       |          |           |           |       |           |          |           |       |           |           |           |       |          |          |          |
| 2.Si                                                                                                                                                                                                                                                                                                                                                                                                                                                                                                                                                                                                                                                                                                                                                                                                                                                                                                                                                                                                                                                                                                                                            | -1.201071 | -1.186005 | -1.993903 |          |      |           |           |           |      |           |           |          |      |           |           |           |      |           |          |          |      |           |           |          |      |          |           |           |      |          |           |           |      |          |           |           |       |          |           |           |       |           |          |           |                                                                                                                                                                                                                                                                                                                                                                                                                                                                                                                                                                                                                                                                                                                                                                                                                                                                                                                                                                                           |           |           |           |          |          |           |           |                                                                                                                                                                                                                                                                                                                                                                                                                                                                                                                                                                                                                                                                                                                                                                                                                                                                                                                                                                                                                                                                                                                                                  |      |           |           |          |      |           |           |           |      |           |          |          |      |           |           |          |      |           |           |          |      |           |           |           |      |          |           |           |       |          |           |           |       |          |          |           |       |          |           |           |       |           |          |           |       |           |           |           |       |          |          |          |
| 3.Si                                                                                                                                                                                                                                                                                                                                                                                                                                                                                                                                                                                                                                                                                                                                                                                                                                                                                                                                                                                                                                                                                                                                            | -1.201071 | -1.186005 | 1.993903  |          |      |           |           |           |      |           |           |          |      |           |           |           |      |           |          |          |      |           |           |          |      |          |           |           |      |          |           |           |      |          |           |           |       |          |           |           |       |           |          |           |                                                                                                                                                                                                                                                                                                                                                                                                                                                                                                                                                                                                                                                                                                                                                                                                                                                                                                                                                                                           |           |           |           |          |          |           |           |                                                                                                                                                                                                                                                                                                                                                                                                                                                                                                                                                                                                                                                                                                                                                                                                                                                                                                                                                                                                                                                                                                                                                  |      |           |           |          |      |           |           |           |      |           |          |          |      |           |           |          |      |           |           |          |      |           |           |           |      |          |           |           |       |          |           |           |       |          |          |           |       |          |           |           |       |           |          |           |       |           |           |           |       |          |          |          |
| 4.Si                                                                                                                                                                                                                                                                                                                                                                                                                                                                                                                                                                                                                                                                                                                                                                                                                                                                                                                                                                                                                                                                                                                                            | -1.206490 | 1.220840  | -2.043973 |          |      |           |           |           |      |           |           |          |      |           |           |           |      |           |          |          |      |           |           |          |      |          |           |           |      |          |           |           |      |          |           |           |       |          |           |           |       |           |          |           |                                                                                                                                                                                                                                                                                                                                                                                                                                                                                                                                                                                                                                                                                                                                                                                                                                                                                                                                                                                           |           |           |           |          |          |           |           |                                                                                                                                                                                                                                                                                                                                                                                                                                                                                                                                                                                                                                                                                                                                                                                                                                                                                                                                                                                                                                                                                                                                                  |      |           |           |          |      |           |           |           |      |           |          |          |      |           |           |          |      |           |           |          |      |           |           |           |      |          |           |           |       |          |           |           |       |          |          |           |       |          |           |           |       |           |          |           |       |           |           |           |       |          |          |          |
| 5.Si                                                                                                                                                                                                                                                                                                                                                                                                                                                                                                                                                                                                                                                                                                                                                                                                                                                                                                                                                                                                                                                                                                                                            | -1.206490 | 1.220840  | 2.043973  |          |      |           |           |           |      |           |           |          |      |           |           |           |      |           |          |          |      |           |           |          |      |          |           |           |      |          |           |           |      |          |           |           |       |          |           |           |       |           |          |           |                                                                                                                                                                                                                                                                                                                                                                                                                                                                                                                                                                                                                                                                                                                                                                                                                                                                                                                                                                                           |           |           |           |          |          |           |           |                                                                                                                                                                                                                                                                                                                                                                                                                                                                                                                                                                                                                                                                                                                                                                                                                                                                                                                                                                                                                                                                                                                                                  |      |           |           |          |      |           |           |           |      |           |          |          |      |           |           |          |      |           |           |          |      |           |           |           |      |          |           |           |       |          |           |           |       |          |          |           |       |          |           |           |       |           |          |           |       |           |           |           |       |          |          |          |
| 6.Si                                                                                                                                                                                                                                                                                                                                                                                                                                                                                                                                                                                                                                                                                                                                                                                                                                                                                                                                                                                                                                                                                                                                            | -1.225763 | 2.401961  | 0.000000  |          |      |           |           |           |      |           |           |          |      |           |           |           |      |           |          |          |      |           |           |          |      |          |           |           |      |          |           |           |      |          |           |           |       |          |           |           |       |           |          |           |                                                                                                                                                                                                                                                                                                                                                                                                                                                                                                                                                                                                                                                                                                                                                                                                                                                                                                                                                                                           |           |           |           |          |          |           |           |                                                                                                                                                                                                                                                                                                                                                                                                                                                                                                                                                                                                                                                                                                                                                                                                                                                                                                                                                                                                                                                                                                                                                  |      |           |           |          |      |           |           |           |      |           |          |          |      |           |           |          |      |           |           |          |      |           |           |           |      |          |           |           |       |          |           |           |       |          |          |           |       |          |           |           |       |           |          |           |       |           |           |           |       |          |          |          |
| 7.Si                                                                                                                                                                                                                                                                                                                                                                                                                                                                                                                                                                                                                                                                                                                                                                                                                                                                                                                                                                                                                                                                                                                                            | 1.225763  | -2.401961 | 0.000000  |          |      |           |           |           |      |           |           |          |      |           |           |           |      |           |          |          |      |           |           |          |      |          |           |           |      |          |           |           |      |          |           |           |       |          |           |           |       |           |          |           |                                                                                                                                                                                                                                                                                                                                                                                                                                                                                                                                                                                                                                                                                                                                                                                                                                                                                                                                                                                           |           |           |           |          |          |           |           |                                                                                                                                                                                                                                                                                                                                                                                                                                                                                                                                                                                                                                                                                                                                                                                                                                                                                                                                                                                                                                                                                                                                                  |      |           |           |          |      |           |           |           |      |           |          |          |      |           |           |          |      |           |           |          |      |           |           |           |      |          |           |           |       |          |           |           |       |          |          |           |       |          |           |           |       |           |          |           |       |           |           |           |       |          |          |          |
| 8.Si                                                                                                                                                                                                                                                                                                                                                                                                                                                                                                                                                                                                                                                                                                                                                                                                                                                                                                                                                                                                                                                                                                                                            | 1.206490  | -1.220840 | -2.043973 |          |      |           |           |           |      |           |           |          |      |           |           |           |      |           |          |          |      |           |           |          |      |          |           |           |      |          |           |           |      |          |           |           |       |          |           |           |       |           |          |           |                                                                                                                                                                                                                                                                                                                                                                                                                                                                                                                                                                                                                                                                                                                                                                                                                                                                                                                                                                                           |           |           |           |          |          |           |           |                                                                                                                                                                                                                                                                                                                                                                                                                                                                                                                                                                                                                                                                                                                                                                                                                                                                                                                                                                                                                                                                                                                                                  |      |           |           |          |      |           |           |           |      |           |          |          |      |           |           |          |      |           |           |          |      |           |           |           |      |          |           |           |       |          |           |           |       |          |          |           |       |          |           |           |       |           |          |           |       |           |           |           |       |          |          |          |
| 9.Si                                                                                                                                                                                                                                                                                                                                                                                                                                                                                                                                                                                                                                                                                                                                                                                                                                                                                                                                                                                                                                                                                                                                            | 1.206490  | -1.220840 | 2.043973  |          |      |           |           |           |      |           |           |          |      |           |           |           |      |           |          |          |      |           |           |          |      |          |           |           |      |          |           |           |      |          |           |           |       |          |           |           |       |           |          |           |                                                                                                                                                                                                                                                                                                                                                                                                                                                                                                                                                                                                                                                                                                                                                                                                                                                                                                                                                                                           |           |           |           |          |          |           |           |                                                                                                                                                                                                                                                                                                                                                                                                                                                                                                                                                                                                                                                                                                                                                                                                                                                                                                                                                                                                                                                                                                                                                  |      |           |           |          |      |           |           |           |      |           |          |          |      |           |           |          |      |           |           |          |      |           |           |           |      |          |           |           |       |          |           |           |       |          |          |           |       |          |           |           |       |           |          |           |       |           |           |           |       |          |          |          |
| 10.Si                                                                                                                                                                                                                                                                                                                                                                                                                                                                                                                                                                                                                                                                                                                                                                                                                                                                                                                                                                                                                                                                                                                                           | 1.201071  | 1.186005  | -1.993903 |          |      |           |           |           |      |           |           |          |      |           |           |           |      |           |          |          |      |           |           |          |      |          |           |           |      |          |           |           |      |          |           |           |       |          |           |           |       |           |          |           |                                                                                                                                                                                                                                                                                                                                                                                                                                                                                                                                                                                                                                                                                                                                                                                                                                                                                                                                                                                           |           |           |           |          |          |           |           |                                                                                                                                                                                                                                                                                                                                                                                                                                                                                                                                                                                                                                                                                                                                                                                                                                                                                                                                                                                                                                                                                                                                                  |      |           |           |          |      |           |           |           |      |           |          |          |      |           |           |          |      |           |           |          |      |           |           |           |      |          |           |           |       |          |           |           |       |          |          |           |       |          |           |           |       |           |          |           |       |           |           |           |       |          |          |          |
| 11.Si                                                                                                                                                                                                                                                                                                                                                                                                                                                                                                                                                                                                                                                                                                                                                                                                                                                                                                                                                                                                                                                                                                                                           | 1.201071  | 1.186005  | 1.993903  |          |      |           |           |           |      |           |           |          |      |           |           |           |      |           |          |          |      |           |           |          |      |          |           |           |      |          |           |           |      |          |           |           |       |          |           |           |       |           |          |           |                                                                                                                                                                                                                                                                                                                                                                                                                                                                                                                                                                                                                                                                                                                                                                                                                                                                                                                                                                                           |           |           |           |          |          |           |           |                                                                                                                                                                                                                                                                                                                                                                                                                                                                                                                                                                                                                                                                                                                                                                                                                                                                                                                                                                                                                                                                                                                                                  |      |           |           |          |      |           |           |           |      |           |          |          |      |           |           |          |      |           |           |          |      |           |           |           |      |          |           |           |       |          |           |           |       |          |          |           |       |          |           |           |       |           |          |           |       |           |           |           |       |          |          |          |
| 1.Si                                                                                                                                                                                                                                                                                                                                                                                                                                                                                                                                                                                                                                                                                                                                                                                                                                                                                                                                                                                                                                                                                                                                            | -1.290281 | -2.476968 | 0.000000  |          |      |           |           |           |      |           |           |          |      |           |           |           |      |           |          |          |      |           |           |          |      |          |           |           |      |          |           |           |      |          |           |           |       |          |           |           |       |           |          |           |                                                                                                                                                                                                                                                                                                                                                                                                                                                                                                                                                                                                                                                                                                                                                                                                                                                                                                                                                                                           |           |           |           |          |          |           |           |                                                                                                                                                                                                                                                                                                                                                                                                                                                                                                                                                                                                                                                                                                                                                                                                                                                                                                                                                                                                                                                                                                                                                  |      |           |           |          |      |           |           |           |      |           |          |          |      |           |           |          |      |           |           |          |      |           |           |           |      |          |           |           |       |          |           |           |       |          |          |           |       |          |           |           |       |           |          |           |       |           |           |           |       |          |          |          |
| 2.Si                                                                                                                                                                                                                                                                                                                                                                                                                                                                                                                                                                                                                                                                                                                                                                                                                                                                                                                                                                                                                                                                                                                                            | -1.144890 | -1.175599 | -1.970498 |          |      |           |           |           |      |           |           |          |      |           |           |           |      |           |          |          |      |           |           |          |      |          |           |           |      |          |           |           |      |          |           |           |       |          |           |           |       |           |          |           |                                                                                                                                                                                                                                                                                                                                                                                                                                                                                                                                                                                                                                                                                                                                                                                                                                                                                                                                                                                           |           |           |           |          |          |           |           |                                                                                                                                                                                                                                                                                                                                                                                                                                                                                                                                                                                                                                                                                                                                                                                                                                                                                                                                                                                                                                                                                                                                                  |      |           |           |          |      |           |           |           |      |           |          |          |      |           |           |          |      |           |           |          |      |           |           |           |      |          |           |           |       |          |           |           |       |          |          |           |       |          |           |           |       |           |          |           |       |           |           |           |       |          |          |          |
| 3.Si                                                                                                                                                                                                                                                                                                                                                                                                                                                                                                                                                                                                                                                                                                                                                                                                                                                                                                                                                                                                                                                                                                                                            | -1.144890 | -1.175599 | 1.970498  |          |      |           |           |           |      |           |           |          |      |           |           |           |      |           |          |          |      |           |           |          |      |          |           |           |      |          |           |           |      |          |           |           |       |          |           |           |       |           |          |           |                                                                                                                                                                                                                                                                                                                                                                                                                                                                                                                                                                                                                                                                                                                                                                                                                                                                                                                                                                                           |           |           |           |          |          |           |           |                                                                                                                                                                                                                                                                                                                                                                                                                                                                                                                                                                                                                                                                                                                                                                                                                                                                                                                                                                                                                                                                                                                                                  |      |           |           |          |      |           |           |           |      |           |          |          |      |           |           |          |      |           |           |          |      |           |           |           |      |          |           |           |       |          |           |           |       |          |          |           |       |          |           |           |       |           |          |           |       |           |           |           |       |          |          |          |
| 4.Si                                                                                                                                                                                                                                                                                                                                                                                                                                                                                                                                                                                                                                                                                                                                                                                                                                                                                                                                                                                                                                                                                                                                            | -1.251151 | 1.199363  | -2.090099 |          |      |           |           |           |      |           |           |          |      |           |           |           |      |           |          |          |      |           |           |          |      |          |           |           |      |          |           |           |      |          |           |           |       |          |           |           |       |           |          |           |                                                                                                                                                                                                                                                                                                                                                                                                                                                                                                                                                                                                                                                                                                                                                                                                                                                                                                                                                                                           |           |           |           |          |          |           |           |                                                                                                                                                                                                                                                                                                                                                                                                                                                                                                                                                                                                                                                                                                                                                                                                                                                                                                                                                                                                                                                                                                                                                  |      |           |           |          |      |           |           |           |      |           |          |          |      |           |           |          |      |           |           |          |      |           |           |           |      |          |           |           |       |          |           |           |       |          |          |           |       |          |           |           |       |           |          |           |       |           |           |           |       |          |          |          |
| 5.Si                                                                                                                                                                                                                                                                                                                                                                                                                                                                                                                                                                                                                                                                                                                                                                                                                                                                                                                                                                                                                                                                                                                                            | -1.251151 | 1.199363  | 2.090099  |          |      |           |           |           |      |           |           |          |      |           |           |           |      |           |          |          |      |           |           |          |      |          |           |           |      |          |           |           |      |          |           |           |       |          |           |           |       |           |          |           |                                                                                                                                                                                                                                                                                                                                                                                                                                                                                                                                                                                                                                                                                                                                                                                                                                                                                                                                                                                           |           |           |           |          |          |           |           |                                                                                                                                                                                                                                                                                                                                                                                                                                                                                                                                                                                                                                                                                                                                                                                                                                                                                                                                                                                                                                                                                                                                                  |      |           |           |          |      |           |           |           |      |           |          |          |      |           |           |          |      |           |           |          |      |           |           |           |      |          |           |           |       |          |           |           |       |          |          |           |       |          |           |           |       |           |          |           |       |           |           |           |       |          |          |          |
| 6.Si                                                                                                                                                                                                                                                                                                                                                                                                                                                                                                                                                                                                                                                                                                                                                                                                                                                                                                                                                                                                                                                                                                                                            | -1.123497 | 2.340300  | 0.000000  |          |      |           |           |           |      |           |           |          |      |           |           |           |      |           |          |          |      |           |           |          |      |          |           |           |      |          |           |           |      |          |           |           |       |          |           |           |       |           |          |           |                                                                                                                                                                                                                                                                                                                                                                                                                                                                                                                                                                                                                                                                                                                                                                                                                                                                                                                                                                                           |           |           |           |          |          |           |           |                                                                                                                                                                                                                                                                                                                                                                                                                                                                                                                                                                                                                                                                                                                                                                                                                                                                                                                                                                                                                                                                                                                                                  |      |           |           |          |      |           |           |           |      |           |          |          |      |           |           |          |      |           |           |          |      |           |           |           |      |          |           |           |       |          |           |           |       |          |          |           |       |          |           |           |       |           |          |           |       |           |           |           |       |          |          |          |
| 7.Si                                                                                                                                                                                                                                                                                                                                                                                                                                                                                                                                                                                                                                                                                                                                                                                                                                                                                                                                                                                                                                                                                                                                            | 1.123497  | -2.340300 | 0.000000  |          |      |           |           |           |      |           |           |          |      |           |           |           |      |           |          |          |      |           |           |          |      |          |           |           |      |          |           |           |      |          |           |           |       |          |           |           |       |           |          |           |                                                                                                                                                                                                                                                                                                                                                                                                                                                                                                                                                                                                                                                                                                                                                                                                                                                                                                                                                                                           |           |           |           |          |          |           |           |                                                                                                                                                                                                                                                                                                                                                                                                                                                                                                                                                                                                                                                                                                                                                                                                                                                                                                                                                                                                                                                                                                                                                  |      |           |           |          |      |           |           |           |      |           |          |          |      |           |           |          |      |           |           |          |      |           |           |           |      |          |           |           |       |          |           |           |       |          |          |           |       |          |           |           |       |           |          |           |       |           |           |           |       |          |          |          |
| 8.Si                                                                                                                                                                                                                                                                                                                                                                                                                                                                                                                                                                                                                                                                                                                                                                                                                                                                                                                                                                                                                                                                                                                                            | 1.251151  | -1.199363 | -2.090099 |          |      |           |           |           |      |           |           |          |      |           |           |           |      |           |          |          |      |           |           |          |      |          |           |           |      |          |           |           |      |          |           |           |       |          |           |           |       |           |          |           |                                                                                                                                                                                                                                                                                                                                                                                                                                                                                                                                                                                                                                                                                                                                                                                                                                                                                                                                                                                           |           |           |           |          |          |           |           |                                                                                                                                                                                                                                                                                                                                                                                                                                                                                                                                                                                                                                                                                                                                                                                                                                                                                                                                                                                                                                                                                                                                                  |      |           |           |          |      |           |           |           |      |           |          |          |      |           |           |          |      |           |           |          |      |           |           |           |      |          |           |           |       |          |           |           |       |          |          |           |       |          |           |           |       |           |          |           |       |           |           |           |       |          |          |          |
| 9.Si                                                                                                                                                                                                                                                                                                                                                                                                                                                                                                                                                                                                                                                                                                                                                                                                                                                                                                                                                                                                                                                                                                                                            | 1.251151  | -1.199363 | 2.090099  |          |      |           |           |           |      |           |           |          |      |           |           |           |      |           |          |          |      |           |           |          |      |          |           |           |      |          |           |           |      |          |           |           |       |          |           |           |       |           |          |           |                                                                                                                                                                                                                                                                                                                                                                                                                                                                                                                                                                                                                                                                                                                                                                                                                                                                                                                                                                                           |           |           |           |          |          |           |           |                                                                                                                                                                                                                                                                                                                                                                                                                                                                                                                                                                                                                                                                                                                                                                                                                                                                                                                                                                                                                                                                                                                                                  |      |           |           |          |      |           |           |           |      |           |          |          |      |           |           |          |      |           |           |          |      |           |           |           |      |          |           |           |       |          |           |           |       |          |          |           |       |          |           |           |       |           |          |           |       |           |           |           |       |          |          |          |
| 10.Si                                                                                                                                                                                                                                                                                                                                                                                                                                                                                                                                                                                                                                                                                                                                                                                                                                                                                                                                                                                                                                                                                                                                           | 1.144890  | 1.175599  | -1.970498 |          |      |           |           |           |      |           |           |          |      |           |           |           |      |           |          |          |      |           |           |          |      |          |           |           |      |          |           |           |      |          |           |           |       |          |           |           |       |           |          |           |                                                                                                                                                                                                                                                                                                                                                                                                                                                                                                                                                                                                                                                                                                                                                                                                                                                                                                                                                                                           |           |           |           |          |          |           |           |                                                                                                                                                                                                                                                                                                                                                                                                                                                                                                                                                                                                                                                                                                                                                                                                                                                                                                                                                                                                                                                                                                                                                  |      |           |           |          |      |           |           |           |      |           |          |          |      |           |           |          |      |           |           |          |      |           |           |           |      |          |           |           |       |          |           |           |       |          |          |           |       |          |           |           |       |           |          |           |       |           |           |           |       |          |          |          |
| 11.Si                                                                                                                                                                                                                                                                                                                                                                                                                                                                                                                                                                                                                                                                                                                                                                                                                                                                                                                                                                                                                                                                                                                                           | 1.144890  | 1.175599  | 1.970498  |          |      |           |           |           |      |           |           |          |      |           |           |           |      |           |          |          |      |           |           |          |      |          |           |           |      |          |           |           |      |          |           |           |       |          |           |           |       |           |          |           |                                                                                                                                                                                                                                                                                                                                                                                                                                                                                                                                                                                                                                                                                                                                                                                                                                                                                                                                                                                           |           |           |           |          |          |           |           |                                                                                                                                                                                                                                                                                                                                                                                                                                                                                                                                                                                                                                                                                                                                                                                                                                                                                                                                                                                                                                                                                                                                                  |      |           |           |          |      |           |           |           |      |           |          |          |      |           |           |          |      |           |           |          |      |           |           |           |      |          |           |           |       |          |           |           |       |          |          |           |       |          |           |           |       |           |          |           |       |           |           |           |       |          |          |          |

|                                                                                                                                                                                                                                                                                                                                                                                                                                                                                                                                                                 |                                                                                                                                                                                                                                                                                                                                                                                                                                                                                                                                                                  |
|-----------------------------------------------------------------------------------------------------------------------------------------------------------------------------------------------------------------------------------------------------------------------------------------------------------------------------------------------------------------------------------------------------------------------------------------------------------------------------------------------------------------------------------------------------------------|------------------------------------------------------------------------------------------------------------------------------------------------------------------------------------------------------------------------------------------------------------------------------------------------------------------------------------------------------------------------------------------------------------------------------------------------------------------------------------------------------------------------------------------------------------------|
| 12.Si 1.269391 2.447860 0.000000<br>13.Cr 0.000000 0.000000 0.000000                                                                                                                                                                                                                                                                                                                                                                                                                                                                                            | 12.Si 1.290281 2.476968 0.000000<br>13.Cr 0.000000 0.000000 0.000000                                                                                                                                                                                                                                                                                                                                                                                                                                                                                             |
| <b><sup>3</sup>B<sub>g</sub>, BLYP functional, E=-55.02321256 eV</b><br>1.Si -1.189603 -2.303948 0.000000<br>2.Si -1.279884 -1.230252 -2.127537<br>3.Si -1.279884 -1.230252 2.127537<br>4.Si -1.163943 1.122462 -2.078055<br>5.Si -1.163943 1.122462 2.078055<br>6.Si -1.200773 2.335886 0.000000<br>7.Si 1.200773 -2.335886 0.000000<br>8.Si 1.163943 -1.122462 -2.078055<br>9.Si 1.163943 -1.122462 2.078055<br>10.Si 1.279884 1.230252 -2.127537<br>11.Si 1.279884 1.230252 2.127537<br>12.Si 1.189603 2.303948 0.000000<br>13.Cr 0.000000 0.000000 0.000000 | <b><sup>3</sup>B<sub>g</sub>, B3LYP functional, E=-70.43418178 eV</b><br>1.Si -1.160487 -2.268261 0.000000<br>2.Si -1.288710 -1.243003 -2.136099<br>3.Si -1.288710 -1.243003 2.136099<br>4.Si -1.122237 1.114724 -2.040524<br>5.Si -1.122237 1.114724 2.040524<br>6.Si -1.226878 2.367051 0.000000<br>7.Si 1.226878 -2.367051 0.000000<br>8.Si 1.122237 -1.114724 -2.040524<br>9.Si 1.122237 -1.114724 2.040524<br>10.Si 1.288710 1.243003 -2.136099<br>11.Si 1.288710 1.243003 2.136099<br>12.Si 1.160487 2.268261 0.000000<br>13.Cr 0.000000 0.000000 0.000000 |
| <b><sup>3</sup>A', BLYP functional, E=-55.01950399 eV</b><br>1.Si 0.041246 -1.231914 -2.404295<br>2.Si -1.993006 -1.360143 -1.193041<br>3.Si 2.068450 -1.046599 -1.217186<br>4.Si -1.993006 -1.360143 1.193041<br>5.Si 2.068450 -1.046599 1.217186<br>6.Si 0.041246 -1.231914 2.404295<br>7.Si -0.038622 1.237645 -2.447314<br>8.Si -2.042408 1.042897 -1.227725<br>9.Si 1.967848 1.357947 -1.189448<br>10.Si -2.042408 1.042897 1.227725<br>11.Si 1.967848 1.357947 1.189448<br>12.Si -0.038622 1.237645 2.447314<br>13.Cr -0.002480 0.000543 0.000000         |                                                                                                                                                                                                                                                                                                                                                                                                                                                                                                                                                                  |
